# Supplementary material for: Six months fixed duration multidrug therapy in paucibacillary leprosy: risk of relapse and disability in Agra PB cohort study
Source: PubMed Central journal article supplement — BMJ Open. 2012 Aug 14;2(4):e001403. doi: 10.1136/bmjopen-2012-001403 (PMC3425897; doi:10.1136/bmjopen-2012-001403), 2012-08-14
Supplement: bmjopen-2012-001403.draft_revisions.pdf [file bmjopen-2012-001403.draft_revisions.pdf]

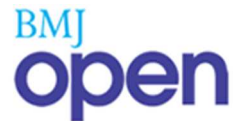

**6 months fixed duration multidrug therapy in paucibacillary leprosy: Risk of relapse and disability in Agra PB cohort study**

|                                                                                                                                                                                                           |                                                                                                                                                                                                                                                                                                         |
|-----------------------------------------------------------------------------------------------------------------------------------------------------------------------------------------------------------|---------------------------------------------------------------------------------------------------------------------------------------------------------------------------------------------------------------------------------------------------------------------------------------------------------|
| Journal:                                                                                                                                                                                                  | <i>BMJ Open</i>                                                                                                                                                                                                                                                                                         |
| Manuscript ID:                                                                                                                                                                                            | bmjopen-2012-001403                                                                                                                                                                                                                                                                                     |
| Article Type:                                                                                                                                                                                             | Research                                                                                                                                                                                                                                                                                                |
| Date Submitted by the Author:                                                                                                                                                                             | 01-May-2012                                                                                                                                                                                                                                                                                             |
| Complete List of Authors:                                                                                                                                                                                 | KUMAR, ANIL; National Institute for Leprosy & Other Mycobacterial Diseases, Biostatistics and Epidemiology<br>GIRDHAR, ANITA; National Institute for Leprosy & Other Mycobacterial Diseases,, CLINICAL<br>Girdhar, Bhavneswar; National Institute for Leprosy & Other Mycobacterial Diseases,, CLINICAL |
| <b>Primary Subject Heading</b>:                                                                                                                                                                           | Health services research                                                                                                                                                                                                                                                                                |
| Secondary Subject Heading:                                                                                                                                                                                | Epidemiology, Evidence based practice, Health services research, Infectious diseases, Public health                                                                                                                                                                                                     |
| Keywords:                                                                                                                                                                                                 | CHEMOTHERAPY, EPIDEMIOLOGY, Health policy < HEALTH SERVICES ADMINISTRATION & MANAGEMENT, Risk management < HEALTH SERVICES ADMINISTRATION & MANAGEMENT, Public health < INFECTIOUS DISEASES, Tropical medicine < INFECTIOUS DISEASES                                                                    |
| <p>Note: The following files were submitted by the author for peer review, but cannot be converted to PDF. You must view these files (e.g. movies) online.</p> <p>PB-Figure 1.emf<br/>PB-Figure 2.emf</p> |                                                                                                                                                                                                                                                                                                         |

SCHOLARONE™  
Manuscripts

1  
2  
3  
4  
5 6 months fixed duration multidrug therapy in paucibacillary leprosy:  
6  
7  
8 Risk of relapse and disability in Agra PB cohort study.  
9

10  
11  
12 by

13  
14 **Dr. Anil Kumar,**

15  
16  
17 **Dr. Anita Girdhar,**

18  
19  
20 **Dr BK Girdhar**

21  
22  
23 **National JALMA Institute for Leprosy,**

24  
25  
26 **Taj Ganj, Agra -282001**

27  
28  
29 **dranil250158@gmail.com**  
30  
31  
32  
33  
34  
35  
36  
37  
38  
39  
40  
41  
42  
43  
44  
45  
46  
47  
48  
49  
50  
51  
52  
53  
54  
55  
56  
57  
58  
59  
60

1  
2  
3  
4  
5 Abstract

6 Background: Low relapses after multidrug therapy in paucibacillary (PB) leprosy led to  
7 recommendation of reducing therapy to 6 months. However only a few reports are available on  
8 long term outcome of 6 months fixed duration therapy for PB patients. Studies on measuring risk of  
9 disability are rare. Present study is to assess the cure; default, relapse and disability in a prospective  
10 cohort of PB leprosy during follow up of >4 years after treatment.

11  
12  
13  
14  
15 Design: Prospective

16  
17 Setting: Primary in our field area of Agra District

18  
19 Participants: 920 paucibacillary leprosy patients entering the study, 621 completed treatment, 599  
20 followed finally including 271 males, no ethnic differentiation, patients of all age groups except  
21 children below 5 years and old persons above 70 years were not included.

22  
23 Treatment: 6 months fix duration multidrug therapy (MDT) as recommended by W.H.O.

24  
25 Primary and Secondary outcomes: Treatment completion, cure, relapse and development of  
26 disability based on clinical assessment by well experienced doctors.

27  
28 Statistical Methods: Data has been analyzed using SPSS software, risk is computed as incidence per  
29 100 person years and test of significance used.

30  
31 Results: Study reports 91% cure rate. Incidence of relapse was 1.3/100 person years with no  
32 significant variation by age, sex, delay in detection, patches, Nerves. Crude incidence of disability  
33 was 2.2% and varied significantly by age and nerve thickening but not by sex, number of patches,  
34 nerves and delay in treatment. Incidence of disability was 0.50/100 person years in treatment  
35 completed and 0.43 among defaulters.

36  
37 Conclusion: Study concludes that relapses do occur after MDT treatment but at the level of 1-2%,  
38 incidence of disability remains low (<1/100 PY) in PB leprosy. Low incidence of relapse and  
39 disability suggests that 6 months therapy is quite effective. However further improvement may  
40 help to improve its efficacy. Longer follow up may add to efficacy measures.

## Introduction

Leprosy is unique in terms of the nature of the causative organism, the chronicity of the disease, its prolonged treatment and the definitions of cure and relapse. The principal mode of assessing the efficacy of therapeutic regimens in leprosy is the relapse rate<sup>1</sup>. The important predisposing factors for relapse include the presence of persisters bacilli, monotherapy, inadequate or irregular therapy, presence of multiple skin lesions and/or thickened nerves and lepromin negativity. The conventional methods of confirming activity or relapse in an infectious disease have limited utility in leprosy because of the difficulty in demonstrating bacilli in paucibacillary (PB) cases and absence of a method of *in vitro* cultivation of *M. leprae*. Bacteriological parameters are useful in smear positive multibacillary (MB) leprosy, whereas in PB leprosy, the criteria for relapse depend primarily on clinical features since even histological examination cannot clearly distinguish between reaction and relapse<sup>2</sup>.

There are wide variations in estimates of relapse rates in different regions. The risk of relapse from programme based data were reported<sup>2-4</sup> to be low from 0.29% to 1.1% and in closely monitored studies it was estimated as 1% to 6.9% for PB leprosy patients after stopping MDT<sup>5,6</sup>. Although most of these studies provided crude estimates of relapse but a few also estimated using person-years of observation, giving relapse rates of 0.65 to 3.0% for PB leprosy<sup>5,7,8</sup>. One of the reasons for low relapse rate was that follow up was done usually for shorter intervals after therapy. Beside relapses in PB leprosy, there is hardly any study in literature reporting risk of developing disability but one<sup>6</sup> based on pre-MDT era reported that 6.7% developed Grade 1 and another 5.2% Grade 2 disability. However, one recent study based on multidrug treatment had given estimates of risk of developing disability of 2.74/100 person years in multibacillary leprosy<sup>9</sup>. Therefore, more studies on long term follow up were required to assess the risk of relapse and disability rate in the cohort of patients treated with 6 months fixed duration therapy and thus the present study was undertaken in cohort PB leprosy patients from field surveys in Agra district –namely Agra cohort, with the objectives to assess the risk of relapse and disability rate beside the extent of treatment completion and cure rate.

## Design and Methods

### Study site, field setting and duration of study

The study was started in our field area in Agra District of Uttar Pradesh on patients detected in field surveys under several studies on prevalence of leprosy during 2001-2006<sup>10-13</sup>. The Agra District is located 200 KM away from Delhi and spread in the radius of 100 KM on either side in length and borders with district Itawa & Firozabad on eastern side, Mathura & Bharatpur on north-west side and Gwalior & Dholpur on south side. Several studies were undertaken since the district was highly endemic for leprosy with prevalence of 16.4/10000 during 2001-03 and 7/10000 during 2004-06. The present study is based on patients detected in such surveys and all patients were followed up till April 2011.

### Inclusion/Exclusion criterion of Patients for the study

The study has been conducted in patients detected in the field survey in Agra district during 2001-06. Newly detected leprosy patients diagnosed clinically as paucibacillary (PB) leprosy were taken for the study. This included patients with upto 5 skin lesions, either erythematous or hypo-pigmented with definite impairment or loss of sensations (tested with ball point pen) and/or 1 thickened nerves. None of the patients had taken leprosy treatment earlier. Children below 5 and adults above 70 were although treated as per norms but not included in the study and so were the pregnant and lactating women.

### Cohort size and treatment allocation

During 2001-2006 in Agra district, several field surveys were undertaken to detect leprosy cases. In these surveys, a total of 1050 paucibacillary (PB) leprosy cases were detected. After excluding cases given ROM in the randomized trial, rest was put on W.H.O. MDT as the cases were detected in ongoing surveys. Of the 920 PB cases, 48 did not start the treatment (2 for pregnancy, 2 old aged, 44 simply refused). After this, 872 cases on PB-MDT, 251 (28.8%) discontinued (defaulted) treatments at various durations and reasons. Therefore, a cohort of 599 (96.5%), out of 621 PB patients completed treatment could be followed up for a mean duration of 4.39(SD:1.6) years after completion of MDT treatment. Present study is based on this cohort of 599 cases (see flow chart).

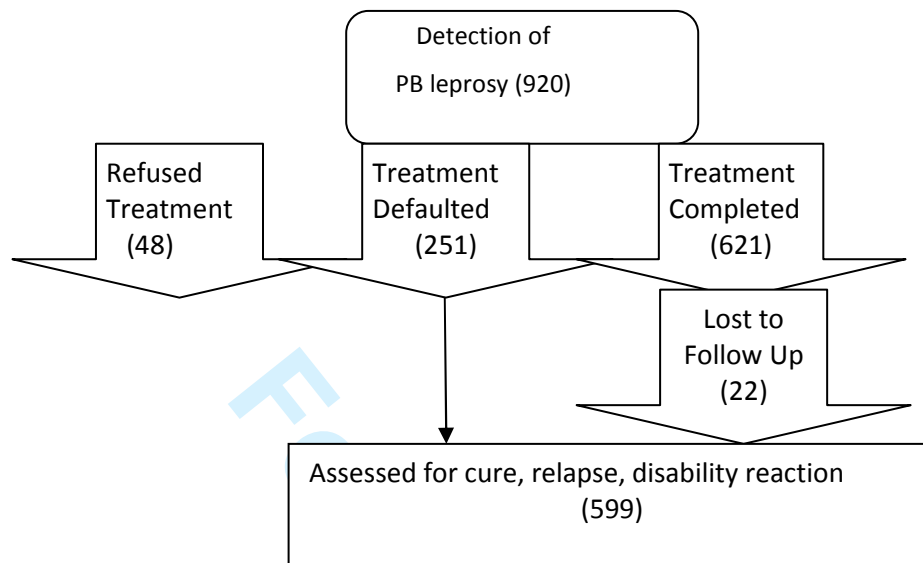

At the time of starting treatment, all the patients were informed about disease, its implications, treatment, possible side effects, remedies and benefits. Although the treatment given was WHO standard regimen as in routine Government leprosy control programme but for reasons of follow up etc patients were asked to consent and then they were put on respective treatment. In case of children, consent of their parents was taken.

### Treatment

W.H.O. supplied MDT packs were used for the study and appropriate W.H.O. recommended doses (Available in blister packs) were given to Children aged 5-14 and adults (aged >14). Monthly PB-MDT was given, with supervisory dose under supervision and for rest of days patients were guided to take daily treatment doses of Dapsone.

### Follow-up and assessment

Patients were visited every month till the completion of treatment for drug intake, clinical conditions and side effects. However, formal assessment of each available patient was made every 6 months for 5 years and annually thereafter. Lesion activity- erythema, infiltration and size, reaction, any new lesion and / or new nerve thickening or any deformity was recorded in consultation with the medical doctor who was apart of the study. Cure of the disease was defined as complete healing of the lesion or patch becoming

1  
2  
3 flat hypopigmented with decrease in size of the lesion and/or regain of sensations. Loss to  
4 follow was defined when patients could not be assessed for fairly long time.  
5  
6

### 7 **Defining Defaulter**

8  
9 A patient who did not complete scheduled 6 months MDT to be able to declare cured. An  
10 early defaulter is the one who did not have more than 2 months of MDT and late defaulter  
11 is with 3 to 5 months MDT.  
12  
13

### 14 **Defining Relapse or Reaction**

15  
16 The case of relapse was confirmed by a clinician with >30 years experience in leprosy.  
17 Gradual or insidious appearance of new lesion(s) or definite increase in size of the lesion  
18 and/or appearance of new nerve thickening were taken as relapse. Any sudden redness,  
19 swelling of the lesion with or without new lesion especially during the first 6 to 12 months  
20 of follow up, was considered as late reaction. All such patients were first put on  
21 corticosteroids<sup>14</sup>. If there was no obvious change in morphology of lesion (inflammation) in  
22 4 weeks, the patients were considered as to have relapsed. If patient responded to 4 weeks  
23 corticosteroids, then it was recorded as reaction and not relapse.  
24  
25  
26  
27  
28  
29  
30  
31

### 32 **Defining disability of Grade 1 and Grade 2**

33  
34 Disability Grade 1 was defined as patient developing anesthesia in palm or sole tested with a ball  
35 point pen and Grade 2 as visible deformity in either Hand or Feet or eye (Lagophthalmas). During  
36 this time, all cases of clinical relapse, reaction and developing of disability (Grade 1 & Grade 2) were  
37 recorded after medical confirmation and necessary medical relief was either provided or referred  
38  
39  
40

### 41 **Ethical Approval and informed consent**

42  
43 Ethical Approval was taken from Institutional ethical committee who was being informed  
44 periodically about the progress of the work. All the patients were informed about the possible side  
45 effects, remedies and benefits. Although the treatment given was WHO standard regimen but for  
46 reasons of follow up etc, the patients were asked to consent and then they were put on respective  
47 treatment. In case of children, consent of their parents was taken.  
48  
49  
50  
51

### 52 **Statistical methods**

1  
2  
3 The comparison of patients developing disability was done using survival analysis and Log-Rank test  
4 to test the significance<sup>15</sup> using SPSS v12 software and Fisher exact test or  $\chi^2$  test of significance used  
5 to compare proportions<sup>16</sup>.  
6  
7  
8  
9

## 10 Results

### 11 Demographic Characteristics of patients

12  
13 The patients of all ages were detected in surveys. The mean age was 34.2 years (SEM=0.6).  
14  
15 About half of total patients (49.7%) were aged 35 & above and only 12.5% were the child  
16 cases (<15 years). Male patients in this study accounted for 45.3% of the total 872 cases  
17 put on PB-MDT. At the time of survey, 51.8% patients were those who reported to acquire  
18 leprosy during last 12 months, 32.3% in last 12-36 months and rest had disease since over  
19 36 months. A total of 79.1% had upto 2 skin patches, 40.3% with 1 thickened nerve, 84.6%  
20 with borderline tuberculoid (BT) disease and only 0.3% (2 cases) were smear positive that  
21 too just 1+. Similar distribution is observed among those completed treatment and  
22 defaulters (Table 1).  
23  
24  
25  
26  
27  
28  
29  
30  
31

### 32 Treatment completion, cure rate and reaction:

33  
34 Of the total 872 patients who were put on PB-MDT treatment, 621(71.2%) completed their  
35 scheduled 6 months treatment and 251 (28.8%) defaulted at various stages of treatment.  
36  
37 Among the defaulters, 70.1% defaulted early (within 3 months) and 29.9% during 3-5  
38 months treatment.  
39  
40

41 Among 621 completed treatments, only 599 could be followed up and 22 were lost to  
42 follow up (LFU). About 83% of the patients could be followed up for 3-8 years and some  
43 2.9% for over 8 years. A total of 545(91%) of the 599 were observed to be completely  
44 cured, 1.7% either not cured or partially cured and rest were observed to have either  
45 relapsed (35), developed reaction (5/599) or developed disability of Grade 1 (5) or Grade 2  
46 (8) (Table 2).  
47  
48  
49  
50  
51  
52

### 53 Incidence of Relapse

54  
55 The overall incidence of relapse was observed to be 1.3 per 100 person years (Figure 1). The  
56 incidence of relapse by age, although, did not change much but was observed to be slightly  
57  
58  
59  
60



1  
2  
3 high in children (<15 years) and among older persons (>54 years). The incidence of relapse  
4 by sex, no. of patches, presence of nerve and delay in treatment also did not vary (Table 3).  
5  
6  
7

### 9 **Incidence of disability among completed treatment vs. defaulters**

10  
11 The crude incidence of disability was observed to be 2.2% in comparison to 2.02% among  
12 defaulters. The crude incidence by age varied significantly among completed treatment  
13 group ( $\chi^2 = 22.7, p=0.0001$ ) and no significant variation found in defaulters. Although no  
14 significant difference in crude incidence of disability was observed by sex, no. of patches  
15 and delay in treatment but by nerve status. Patient initially with no nerve developed  
16 disability more ( $\chi^2 = 4.1, p=0.043$ ) (Table 4).  
17  
18

19 Of the 592 patients completed treatment and followed up for over 4 years (Mean = 4.4  
20 years), 13 new cases of disability were observed during follow suggesting incidence of  
21 disability as 0.50 per 100 person years (PY) in comparison to 0.43 among defaulters (Table  
22 5, Figure 2). Among the defaulters, incidence of disability was 0.43 in early default and 0.41  
23 in late default.  
24  
25  
26  
27  
28  
29  
30  
31  
32  
33

### 34 **Discussions and Conclusion**

35  
36 In the present study, 91% of the PB leprosy patients who completed treatment and  
37 followed up were completely cured. The reaction rate was observed to be very low (0.8%).  
38 The occurrence of events like reaction, relapse and disability measures the efficacy of any  
39 treatment regimen. In present cohort of PB leprosy, the relapse rates have been reported  
40 in some studies after MDT with a low rate in programme based data and high in closely  
41 monitored studies. Some studies had reported relapse rate of <1% to 6.9% in PB leprosy<sup>2-8</sup>.  
42 In the present study, overall relapse rate is observed as 1.3/100 persons years in the PB  
43 cohort observed during 2001-10 in Agra district. Most relapses (30/35) were observed 1-5  
44 years after releasing from treatment and almost 11.4% (4/35) beyond 5 years of follow up.  
45 The relapse rates did not differ significantly by age, sex, delay at detection, clinical status  
46 and with nerve involvement.  
47  
48  
49  
50  
51  
52  
53  
54  
55  
56  
57  
58  
59  
60

1  
2  
3 Although it is difficult to qualify for high and low relapse rates but relapses do occur and  
4 can occur anytime after release from treatment<sup>13</sup>. More relapse may be seen if these  
5 patients are followed up for further longer period but extent is not easy to project. In  
6 many cases, the cause of relapse may be individuals' immunological response to  
7 mycobacteria. It would therefore be interesting to investigate the reason of relapses—is it  
8 insufficient treatment causing early relapse, persistent dormant mycobacteria leading to  
9 late relapse or immunological variations across populations giving mix of above two?  
10

11  
12 The incidence of disability was noticed 13 patients (5 Grade 1 & 8 Grade 2). Although crude  
13 incidence of 2.02% was noticed and significant variation by age ( $\chi^2=22.7$ ,  $p=0.0001$ ) and  
14 nerve involvement ( $\chi^2=4.1$ ,  $p=0.043$ ) but no significant difference observed by sex, number  
15 of patches and duration of delay in treatment. The overall incidence of disability was 0.50  
16 per 100 person years among the group of completing treatment and 0.43 per 100 person  
17 years among treatment defaulters (Table 5, Figure 2) with very little difference between  
18 early and late defaulters (Log rank test=0.23,  $p=0.63$ ). This study observed much lower  
19 crude incidence of disability than as observed in a pre-MDT time study that reported crude  
20 incidence of grade 1 & grade 2 disabilities as 6.7% & 5.2% respectively<sup>6</sup>.  
21

22  
23 The findings of present study once again confirms the findings of another cohort study on  
24 MB leprosy<sup>9</sup> that treatment status (complete vs. default) probably does not affect the risk  
25 of disability but initiation of treatment may do so. This is beside the fact that at what stage  
26 treatment is taken after the disease starts progressing. However, some early cases of grade  
27 1 disability may get altered to normal<sup>6</sup> but many may advance disability to grade 2. This is  
28 an important feature of leprosy and may be the result of already set-in pathways for  
29 disabilities.  
30  
31

32  
33  
34  
35  
36  
37  
38  
39  
40  
41  
42  
43  
44  
45  
46  
47  
48  
49  
50  
51 **Acknowledgement:** Authors gratefully acknowledges the help extended by the institute by  
52 providing internal grant for the study. Thanks are also due to all patients who cooperated in the  
53 study and the paramedical workers and District leprosy officer for the support.  
54

55  
56 **Contributors:** Although all authors were responsible for the conception, design and acquisition of  
57 data, drafting, revising and final approval of the article. AK played the lead role in planning,  
58  
59

1  
2  
3 conducting, supervising field study, analysis and report writing; AG for clinical evaluation and BKG  
4 for clinical monitoring and report preparation.  
5

6  
7 **Funding** : This study was supported by an institutional grant from the National JALMA Institute for  
8 Leprosy, Taj Ganj, Agra. No specific funding was asked from any external agency.  
9

10  
11 **Conflict of interests**: None

12 **Patient Consent**: obtained

13  
14 **Ethical Approval** was granted by the institutional ethical committee, which was being informed  
15 periodically about the progress of the work.  
16  
17  
18  
19  
20  
21  
22  
23  
24  
25  
26  
27  
28  
29  
30  
31  
32  
33  
34  
35  
36  
37  
38  
39  
40  
41  
42  
43  
44  
45  
46  
47  
48  
49  
50  
51  
52  
53  
54  
55  
56  
57  
58  
59  
60

1  
2  
3  
4  
5  
6  
7  
8  
9  
10  
11  
12  
13  
14  
15  
16  
17  
18  
19  
20  
21  
22  
23  
24  
25  
26  
27  
28  
29  
30  
31  
32  
33  
34  
35  
36  
37  
38

| Characteristics             | Patients on W.H.O. MDT (872) |                          |                          |
|-----------------------------|------------------------------|--------------------------|--------------------------|
|                             | %Total (872)                 | Completed Treatment(621) | Defaulted treatment(251) |
| Age                         |                              |                          |                          |
| ≤14                         | 12.5                         | 13.8                     | 9.2                      |
| 15-34                       | 37.8                         | 36.9                     | 40.2                     |
| 35-54                       | 35.6                         | 36.4                     | 33.5                     |
| >54                         | 14.1                         | 12.9                     | 17.1                     |
| Mean (SEM)                  | 34.2(0.6)                    | =                        | =                        |
| Sex                         |                              |                          |                          |
| Male                        | 45.3                         | 48.1                     | 38.2                     |
| Female                      | 54.7                         | 51.9                     | 61.8                     |
| Delay in detection (months) |                              |                          |                          |
| ≤12                         | 51.8                         | 49.6                     | 57.4                     |
| 13-36                       | 32.3                         | 34.0                     | 28.3                     |
| >36                         | 15.8                         | 16.4                     | 14.3                     |
| Patches                     |                              |                          |                          |
| 0-2                         | 79.1                         | 78.1                     | 81.7                     |
| 3-5                         | 20.9                         | 21.9                     | 18.3                     |
| Nerves                      |                              |                          |                          |
| 0                           | 59.7                         | 58.3                     | 63.3                     |
| 1                           | 40.3                         | 41.7                     | 36.7                     |
| Clinical status             |                              |                          |                          |
| I/TT                        | 12.9                         | 12.7                     | 13.5                     |
| BT/BTR                      | 84.6                         | 85.0                     | 83.7                     |
| N                           | 2.5                          | 2.3                      | 2.8                      |
| Smear                       |                              |                          |                          |
| +ve                         | 0.2                          | 0.3                      | 0                        |
| -Ve                         | 18.4                         | 18.8                     | 17.1                     |
| Not done                    | 81.4                         | 80.9                     | 82.9                     |

39  
40  
41  
42  
43  
44  
45  
46  
47  
48  
49  
50  
51  
52  
53  
54  
55  
56  
57  
58  
59  
60

| Clinical status   | Duration of Follow up (Years) |     |     |     |    | Total(%)   |
|-------------------|-------------------------------|-----|-----|-----|----|------------|
|                   | <1                            | 1-3 | 3-5 | 5-8 | >8 |            |
| Complete Cure     | 18                            | 40  | 357 | 114 | 16 | 545 (91.0) |
| Partial /Not Cure | 5                             | 3   | 2   | 0   | 0  | 10(1.7)    |
| Relapse           | 1                             | 11  | 12  | 2   | 0  | 26(4.3)    |
| Relapse+Reaction  | 0                             | 0   | 2   | 0   | 0  | 2 (0.3)    |
| Relapse+Grade 1   | 0                             | 0   | 1   | 1   | 1  | 3(0.5)     |
| Relapse+Grade 2   | 0                             | 2   | 2   | 0   | 0  | 4(0.7)     |
| Only Grade 1      | 0                             | 0   | 1   | 0   | 0  | 1(0.2)     |
| Only Grade 2      | 0                             | 2   | 2   | 0   | 0  | 4(0.7)     |
| Not cured+Grade 1 | 0                             | 0   | 1   | 0   | 0  | 1(0.2)     |
| Type 1 Reaction   | 1                             | 2   | 0   | 0   | 0  | 3(0.5)     |
| Total             | 25                            | 60  | 380 | 117 | 17 | 599        |

|   |         |          |      |          |     |         |
|---|---------|----------|------|----------|-----|---------|
| % | 4.<br>2 | 10.<br>0 | 63.4 | 19.<br>5 | 2.9 | (100.0) |
|---|---------|----------|------|----------|-----|---------|

Table 3: Incidence of relapses/100 person years at risk

|                                  | Cases | Mean Person Years | Person Years at risk (PYAR) | No. of Relapses | Relapse /100 PYAR |
|----------------------------------|-------|-------------------|-----------------------------|-----------------|-------------------|
| Age <15                          | 81    | 4.62              | 374.4                       | 06              | 1.6               |
| 15-34                            | 221   | 4.23              | 933.8                       | 11              | 1.2               |
| 35-54                            | 220   | 4.53              | 996.7                       | 10              | 1.0               |
| >54                              | 77    | 4.31              | 331.7                       | 08              | 2.4               |
| Total                            | 599   | 4.39              | 2636.4                      | 35              | 1.3               |
| Sex Male                         | 287   | 4.27              | 1226.9                      | 16              | 1.3               |
| Female                           | 312   | 4.52              | 1409.5                      | 19              | 1.4               |
| Delay in Treatment (Year) Upto 1 | 301   | 4.37              | 1315.2                      | 17              | 1.3               |
| 1-2                              | 201   | 4.22              | 850.8                       | 11              | 1.3               |
| >3                               | 97    | 4.85              | 470.4                       | 07              | 1.5               |
| Patches 0-2                      | 466   | 4.37              | 2037.7                      | 28              | 1.4               |
| 3-5                              | 133   | 4.50              | 598.7                       | 07              | 1.2               |
| Nerves 0                         | 344   | 4.24              | 1458.7                      | 21              | 1.4               |
| 1                                | 255   | 4.62              | 1177.7                      | 14              | 1.2               |

Table 4: Crude incidence of disability among PB Leprosy

| Factor                    | Completed Treatment |      | Defaulters |      | X <sup>2</sup> and p-value |            |
|---------------------------|---------------------|------|------------|------|----------------------------|------------|
|                           | Cases               | %CID | Cases      | %CID | Completed Treatment        | Defaulters |
| Age <15                   | 81                  | 0    | 20         | 0    | 22.7, 0.0001               | NS         |
| 15-34                     | 217                 | 0.46 | 71         | 1.41 |                            |            |
| 35-54                     | 219                 | 2.28 | 72         | 2.78 |                            |            |
| >54                       | 75                  | 9.33 | 35         | 2.86 |                            |            |
| Total                     | 592                 | 2.20 | 198        | 2.02 |                            |            |
| Sex Male                  | 280                 | 1.74 | 66         | 0    | NS                         | NS         |
| Female                    | 312                 | 2.56 | 132        | 3.01 |                            |            |
| Patch 0-2                 | 459                 | 2.18 | 164        | 1.83 | NS                         | NS         |
| 3-5                       | 133                 | 2.26 | 34         | 2.94 |                            |            |
| Nerve 0                   | 344                 | 1.16 | 127        | 2.36 | 4.1, 0.043                 | NS         |
| 1                         | 248                 | 3.63 | 71         | 1.41 |                            |            |
| Delay in Treatment <12 Mo | 299                 | 1.67 | 115        | 2.61 | NS                         | NS         |

|       |     |      |    |      |  |  |
|-------|-----|------|----|------|--|--|
| 13-36 | 200 | 3.00 | 55 | 0    |  |  |
| >36   | 93  | 2.15 | 28 | 3.57 |  |  |

Table 5: Incidence of disability/100 person years at risk

|                         | Cases | Mean Person Years | Person Years at risk (PYAR) | new disability cases | incidence/ 100 PYAR |
|-------------------------|-------|-------------------|-----------------------------|----------------------|---------------------|
| Completed MDT Treatment | 592   | 4.40              | 2597.4                      | 13                   | 0.50*               |
| Defaulters of MDT       | 198   | 4.72              | 933.7                       | 4                    | 0.43*               |
| Early (<3 months)       | 142   | 4.87              | 691.4                       | 3                    | 0.43                |
| Late (3-5 month)        | 56    | 4.33              | 242.3                       | 1                    | 0.41                |
| All                     | 789   | 4.48              | 3531.1                      | 17                   | 0.48                |

\*Log rank test= 0.23, p=0.63

## Reference

1. Kaimal S, Thapa DM. Relapse in leprosy. *Ind J Derm Ven Lep* 2009; 75(2): 126-135.
2. Becx-Bleumink M. Relapse among leprosy patients treated with multidrug therapy. Experience in the leprosy control programme of ALERT in Ethiopia; practical difficulties with diagnosing relapse, operational procedures and criteria for diagnosing relapse. *Int J Lepr* 1992;60:421-435.
3. The Leprosy Unit, WHO. Risk of relapse in leprosy. *Indian J Lepr* 1995;67:13-26.
4. Lobo D. Treatment failures with multidrug treatment. *Lepr Rev* 1992;63:93s-98s.
5. Abdul KS. An analysis of relapsed leprosy cases. *Ind J Derm Ven Lep* 2000; 66(3): 126-128.
6. Pandian TD, Sithambram M, Bharathi R, Ramu G. A study of relapse in non-lepromatous and intermediate groups of leprosy. *Ind J Lepr* 1985; 57(1):149-158.
7. Ali MK, Thorat DM, Subramanian M, Parthasarathy G, Selvaraj U, Prabhakar V. A study on trend of relapse in leprosy and factors influencing relapse. *Indian J Lepr* 2005;77:105-15.
8. Boerrigter G, Ponnighaus JM, Fine PE, Wilson RJ. Four-year follow up results of a WHO-recommended multiple-drug regimen in paucibacillary leprosy patients in Malawi. *Int J Lepr* 1991;59:255-61.
9. Kumar A, Girdhar A, Girdhar BK. Risk of developing disability in pre and post multidrug therapy treatment among multibacillary leprosy: Agra MB Cohort study. **BMJ open** 2012;2:e000361.doi:10.1136/bmjopen-2011-000361.
10. Kumar A, Yadav VS, Girdhar A, et al. Some Epidemiological Observations on Leprosy in Agra, India. *Int J Lepr* **2001, 69(3):234-240**.
11. Kumar A, Girdhar A, Girdhar BK. Epidemiology of Leprosy in Urban Agra, India. *Lepr Rev*, 2003; 74:31-34.
12. Kumar A, Girdhar A, Girdhar BK. Prevalence of leprosy in Agra district (U.P.) India during 2001-2003. *Int J Lepr* ,2005, 73(2):115-121.
13. Kumar A, Girdhar A, Chakma JC, et al. A rapid survey for Leprosy in Agra District (2004-06): Epidemiological Observations. *J Commun Dis*; 2008,40(4): 277-284
14. Ramachandran A, Seshadri PS. Relapses or reversal reaction: the case for a therapeutic trial of steroids. *Lepr Rev* 1988;59:271-272.
15. Statistical Programme for Social Scientists (SPSS), v.12. USA.1999.
16. Le Chap T. Analysis of Categorical data. USA: John Wiley & Sons, 1988.
17. Pattyn SR. Incubation time of relapses after treatment of paucibacillary leprosy. *Lepr Rev* 1984;55(2):115-120.

STROBE 2007 (v4) Statement—Checklist of items that should be included in reports of cohort studies

| Section/Topic             | Item # | Recommendation                                                                                                                                                                       | Reported on page # |
|---------------------------|--------|--------------------------------------------------------------------------------------------------------------------------------------------------------------------------------------|--------------------|
| Title and abstract        | 1      | (a) Indicate the study’s design with a commonly used term in the title or the abstract                                                                                               | 1                  |
|                           |        | (b) Provide in the abstract an informative and balanced summary of what was done and what was found                                                                                  | 2                  |
| <b>Introduction</b>       |        |                                                                                                                                                                                      |                    |
| Background/rationale      | 2      | Explain the scientific background and rationale for the investigation being reported                                                                                                 | 3                  |
| Objectives                | 3      | State specific objectives, including any prespecified hypotheses                                                                                                                     | 3                  |
| <b>Methods</b>            |        |                                                                                                                                                                                      |                    |
| Study design              | 4      | Present key elements of study design early in the paper                                                                                                                              | 4-6                |
| Setting                   | 5      | Describe the setting, locations, and relevant dates, including periods of recruitment, exposure, follow-up, and data collection                                                      | 4                  |
| Participants              | 6      | (a) Give the eligibility criteria, and the sources and methods of selection of participants. Describe methods of follow-up                                                           | 4                  |
|                           |        | (b) For matched studies, give matching criteria and number of exposed and unexposed                                                                                                  |                    |
| Variables                 | 7      | Clearly define all outcomes, exposures, predictors, potential confounders, and effect modifiers. Give diagnostic criteria, if applicable                                             | 5                  |
| Data sources/ measurement | 8*     | For each variable of interest, give sources of data and details of methods of assessment (measurement). Describe comparability of assessment methods if there is more than one group | 5-6                |
| Bias                      | 9      | Describe any efforts to address potential sources of bias                                                                                                                            | none               |
| Study size                | 10     | Explain how the study size was arrived at                                                                                                                                            | 4                  |
| Quantitative variables    | 11     | Explain how quantitative variables were handled in the analyses. If applicable, describe which groupings were chosen and why                                                         | 5-6                |
| Statistical methods       | 12     | (a) Describe all statistical methods, including those used to control for confounding                                                                                                | 6                  |
|                           |        | (b) Describe any methods used to examine subgroups and interactions                                                                                                                  |                    |
|                           |        | (c) Explain how missing data were addressed                                                                                                                                          | Not applicable     |
|                           |        | (d) If applicable, explain how loss to follow-up was addressed                                                                                                                       | 5                  |
|                           |        | (e) Describe any sensitivity analyses                                                                                                                                                |                    |
| <b>Results</b>            |        |                                                                                                                                                                                      |                    |



|                          |     |                                                                                                                                                                                                              |     |
|--------------------------|-----|--------------------------------------------------------------------------------------------------------------------------------------------------------------------------------------------------------------|-----|
| Participants             | 13* | (a) Report numbers of individuals at each stage of study—eg numbers potentially eligible, examined for eligibility, confirmed eligible, included in the study, completing follow-up, and analysed            | 6   |
|                          |     | (b) Give reasons for non-participation at each stage                                                                                                                                                         | 5-6 |
|                          |     | (c) Consider use of a flow diagram                                                                                                                                                                           | 5   |
| Descriptive data         | 14* | (a) Give characteristics of study participants (eg demographic, clinical, social) and information on exposures and potential confounders                                                                     | 7   |
|                          |     | (b) Indicate number of participants with missing data for each variable of interest                                                                                                                          | 5-6 |
|                          |     | (c) Summarise follow-up time (eg, average and total amount)                                                                                                                                                  | 8   |
| Outcome data             | 15* | Report numbers of outcome events or summary measures over time                                                                                                                                               | 7-8 |
| Main results             | 16  | (a) Give unadjusted estimates and, if applicable, confounder-adjusted estimates and their precision (eg, 95% confidence interval). Make clear which confounders were adjusted for and why they were included | 7-8 |
|                          |     | (b) Report category boundaries when continuous variables were categorized                                                                                                                                    | 7-8 |
|                          |     | (c) If relevant, consider translating estimates of relative risk into absolute risk for a meaningful time period                                                                                             |     |
| Other analyses           | 17  | Report other analyses done—eg analyses of subgroups and interactions, and sensitivity analyses                                                                                                               |     |
| <b>Discussion</b>        |     |                                                                                                                                                                                                              |     |
| Key results              | 18  | Summarise key results with reference to study objectives                                                                                                                                                     | 8-9 |
| <b>Limitations</b>       |     |                                                                                                                                                                                                              |     |
| Interpretation           | 20  | Give a cautious overall interpretation of results considering objectives, limitations, multiplicity of analyses, results from similar studies, and other relevant evidence                                   | 8-9 |
| Generalisability         | 21  | Discuss the generalisability (external validity) of the study results                                                                                                                                        | 8-9 |
| <b>Other information</b> |     |                                                                                                                                                                                                              |     |
| Funding                  | 22  | Give the source of funding and the role of the funders for the present study and, if applicable, for the original study on which the present article is based                                                | 10  |

\*Give information separately for cases and controls in case-control studies and, if applicable, for exposed and unexposed groups in cohort and cross-sectional studies.

**Note:** An Explanation and Elaboration article discusses each checklist item and gives methodological background and published examples of transparent reporting. The STROBE checklist is best used in conjunction with this article (freely available on the Web sites of PLoS Medicine at <http://www.plosmedicine.org/>, Annals of Internal Medicine at <http://www.annals.org/>, and Epidemiology at <http://www.epidem.com/>). Information on the STROBE Initiative is available at [www.strobe-statement.org](http://www.strobe-statement.org).



**6 months fixed duration multidrug therapy in paucibacillary leprosy: Risk of relapse and disability in Agra PB cohort study**

|                                                                                                                                                         |                                                                                                                                                                                                                                                                                                         |
|---------------------------------------------------------------------------------------------------------------------------------------------------------|---------------------------------------------------------------------------------------------------------------------------------------------------------------------------------------------------------------------------------------------------------------------------------------------------------|
| Journal:                                                                                                                                                | <i>BMJ Open</i>                                                                                                                                                                                                                                                                                         |
| Manuscript ID:                                                                                                                                          | bmjopen-2012-001403.R1                                                                                                                                                                                                                                                                                  |
| Article Type:                                                                                                                                           | Research                                                                                                                                                                                                                                                                                                |
| Date Submitted by the Author:                                                                                                                           | 03-Jul-2012                                                                                                                                                                                                                                                                                             |
| Complete List of Authors:                                                                                                                               | KUMAR, ANIL; National Institute for Leprosy & Other Mycobacterial Diseases, Biostatistics and Epidemiology<br>GIRDHAR, ANITA; National Institute for Leprosy & Other Mycobacterial Diseases,, CLINICAL<br>Girdhar, Bhavneswar; National Institute for Leprosy & Other Mycobacterial Diseases,, CLINICAL |
| <b>Primary Subject Heading</b>:                                                                                                                         | Health services research                                                                                                                                                                                                                                                                                |
| Secondary Subject Heading:                                                                                                                              | Epidemiology, Evidence based practice, Health services research, Infectious diseases, Public health                                                                                                                                                                                                     |
| Keywords:                                                                                                                                               | Health informatics < BIOTECHNOLOGY & BIOINFORMATICS, EPIDEMIOLOGY, Dermatological epidemiology < DERMATOLOGY, CHEMOTHERAPY                                                                                                                                                                              |
| Note: The following files were submitted by the author for peer review, but cannot be converted to PDF. You must view these files (e.g. movies) online. |                                                                                                                                                                                                                                                                                                         |
| PB-Figure 1.emf<br>PB-Figure 2.emf                                                                                                                      |                                                                                                                                                                                                                                                                                                         |

SCHOLARONE™  
Manuscripts

1  
2  
3  
4  
5 6 months fixed duration multidrug therapy in paucibacillary leprosy:  
6  
7  
8 Risk of relapse and disability in Agra PB cohort study.  
9

10  
11  
12 by

13  
14 **Dr. Anil Kumar,**

15  
16  
17 **Dr. Anita Girdhar,**

18  
19  
20 **Dr BK Girdhar**

21  
22  
23 **National JALMA Institute for Leprosy,**

24  
25  
26 **Taj Ganj, Agra -282001**

27  
28  
29 **dranil250158@gmail.com**  
30  
31  
32  
33  
34  
35  
36  
37  
38  
39  
40  
41  
42  
43  
44  
45  
46  
47  
48  
49  
50  
51  
52  
53  
54  
55  
56  
57  
58  
59  
60

## Abstract

**Background:** Low relapses after 12 months multidrug therapy in paucibacillary (PB) leprosy led to recommendation of reducing therapy to 6 months. However only a few reports are available on long term outcome of 6 months fixed duration therapy for PB patients. Studies on measuring risk of disability are rare. Present study is to assess the cure; default, relapse and disability in a prospective cohort of PB leprosy during follow up of >4 years after treatment.

**Design:** Prospective

**Setting:** Primary in our field area of Agra District

**Participants:** 920 paucibacillary leprosy patients entering the study, 621 completed treatment, 599 followed finally including 271 males, no ethnic differentiation, patients of all age groups except children below 5 years and old persons above 70 years were not included.

**Treatment:** 6 months fix duration multidrug therapy (MDT) as recommended by W.H.O.

**Primary and Secondary outcomes:** Treatment completion, cure, relapse and development of disability based on clinical assessment by well experienced doctors.

**Statistical Methods:** Data has been analyzed using SPSS software, risk is computed as incidence per 100 person years and test of significance used.

**Results:** Study reports 91% cure rate. Incidence of relapse was 1.3/100 person years with no significant variation by age, sex, delay in detection, patches, Nerves. Crude incidence of disability was 2.2% and varied significantly by age and nerve thickening but not by sex, number of patches, nerves and delay in treatment. Incidence of disability was 0.50/100 person years in treatment completed and 0.43 among defaulters.

**Conclusion:** Study concludes that relapses do occur after MDT treatment but at the level of 1-2%, incidence of disability remains low (<1/100 PY) in PB leprosy. Low incidence of relapse and disability suggests that 6 months therapy is quite effective. However further improvement may help to improve its efficacy. Longer follow up may add to efficacy measures.

## Introduction

Leprosy is unique in terms of the nature of the causative organism, the chronicity of the disease, its prolonged treatment and the definitions of cure and relapse. The principal mode of assessing the effectiveness of therapeutic regimens in leprosy is the relapse rate<sup>1</sup>. The important predisposing factors for relapse include the presence of persisters bacilli, monotherapy, inadequate or irregular therapy, presence of multiple skin lesions and/or thickened nerves and lepromin negativity. The conventional methods of confirming activity or relapse in an infectious disease have limited utility in leprosy because of the difficulty in demonstrating bacilli in paucibacillary (PB) cases and absence of a method of *in vitro* cultivation of *M. leprae*. Bacteriological parameters are useful in smear positive multibacillary (MB) leprosy, whereas in PB leprosy, the criteria for relapse depend primarily on clinical features since even histological examination cannot clearly distinguish between reaction and relapse<sup>2</sup>.

There are wide variations in estimates of relapse rates in different regions. The risk of relapse from programme based data were reported<sup>2-4</sup> to be low from 0.29% to 1.1% and in closely monitored studies it was estimated as 1% to 6.9% for PB leprosy patients after stopping MDT<sup>5,6</sup>. Although most of these studies provided crude estimates of relapse but a few also estimated using person-years of observation, giving relapse rates of 0.65 to 3.0 per 100 person years for PB leprosy<sup>5,7,8</sup>.

One of the reasons for low relapse rate was that follow up was done usually for shorter intervals after therapy. Beside relapses in PB leprosy, there is hardly any study in literature reporting risk of developing disability but one<sup>6</sup> based on pre-MDT era reported that 6.7% developed Grade 1 and another 5.2% Grade 2 disability. However, one recent study based on multidrug treatment had given estimates of risk of developing disability of 2.74/100 person years in multibacillary leprosy<sup>9</sup>. Therefore, more studies on long term follow up were required to assess the risk of relapse and disability rate in the cohort of patients treated with 6 months fixed duration therapy and thus the present study was undertaken in cohort PB leprosy patients from field surveys in Agra district –namely Agra cohort, with the objectives to assess the risk of relapse and disability rate beside the extent of treatment completion and cure rate.

## Design and Methods

### Study site, field setting and duration of study

The study was started in our field area in Agra District of Uttar Pradesh on patients detected in field surveys under several studies on prevalence of leprosy during 2001-2006<sup>10-13</sup>. The Agra District is located 200 KM away from Delhi and spread in the radius of 100 KM on either side in length and borders with district Itawa & Firozabad on eastern side, Mathura & Bharatpur on north-west side and Gwalior & Dholpur on south side. Several studies were undertaken since the district was highly endemic for leprosy with prevalence of 16.4/10000 during 2001-03 and 7/10000 during 2004-06. The present study is based on patients detected in such surveys and all patients were followed up till April 2011.

### Inclusion/Exclusion criterion of Patients for the study

The study has been conducted in patients detected in the field survey in Agra district during 2001-06. Newly detected leprosy patients diagnosed clinically as paucibacillary (PB) leprosy were taken for the study. This included patients with upto 5 skin lesions, either erythematous or hypo-pigmented with definite impairment or loss of sensations (tested with ball point pen) and/or 1 thickened nerves. None of the patients had taken leprosy treatment earlier. Children below 5 and adults above 70 were although treated as per norms but not included in the study and so were the pregnant and lactating women.

### Cohort size and treatment allocation

During 2001-2006 in Agra district, several field surveys were undertaken to detect leprosy cases. In these surveys, a total of 1050 paucibacillary (PB) leprosy cases were detected. After excluding cases given ROM in the randomized trial, rest was put on W.H.O. MDT as the cases were detected in ongoing surveys. Of the 920 PB cases, 48 did not start the treatment (2 for pregnancy, 2 old aged, 44 simply refused). After this, 872 cases on PB-MDT, 251 (28.8%) discontinued (defaulted) treatments at various durations and reasons. Therefore, a cohort of 599 (96.5%), out of 621 PB patients completed treatment could be

followed up for a mean duration of 4.39(SD:1.6) years after completion of MDT treatment. Present study is based on this cohort of 599 cases (see flow chart).

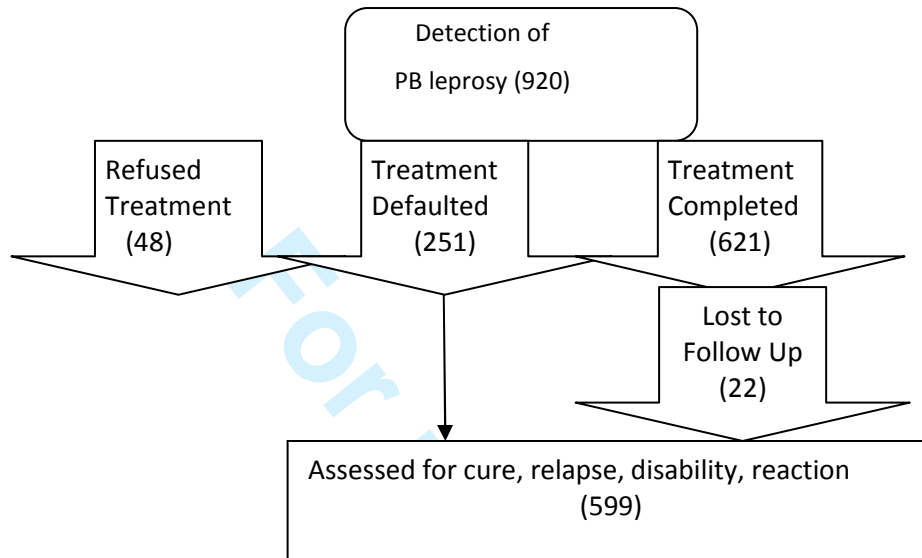

At the time of starting treatment, all the patients were informed about disease, its implications, treatment, possible side effects, remedies and benefits. Although the treatment given was WHO standard regimen as in routine Government leprosy control programme but for reasons of follow up etc patients were asked to consent and then they were put on respective treatment. In case of children, consent of their parents was taken.

### Treatment

W.H.O. supplied MDT packs were used for the study and appropriate W.H.O. recommended doses (Available in blister packs) were given to Children aged 5-14 and adults (aged >14). Monthly PB-MDT was given, with supervisory dose under supervision and for rest of days patients were guided to take daily treatment doses of Dapsone.

### Follow-up and assessment

Patients were visited every month till the completion of treatment for drug intake, clinical conditions and side effects. However, formal assessment of each available patient was made every 6 months for 5 years and annually thereafter. Lesion activity- erythema, infiltration and size, reaction, any new lesion and / or new nerve thickening or any deformity was recorded in consultation with the medical doctor who was apart of the

1  
2  
3 study. Cure of the disease was defined as complete healing of the lesion or patch becoming  
4 flat hypopigmented with decrease in size of the lesion and/or regain of sensations. Loss to  
5 follow was defined when patients could not be assessed for fairly long time.  
6  
7

### 8 9 **Defining Defaulter**

10 A patient who did not complete scheduled 6 months MDT to be able to declare cured. An  
11 early defaulter is the one who did not have more than 2 months of MDT and late defaulter  
12 is with 3 to 5 months MDT.  
13  
14

### 15 16 **Defining Relapse or Reaction**

17 The case of relapse was confirmed by a clinician with >30 years experience in leprosy.  
18 Gradual or insidious appearance of new lesion(s) or definite increase in size of the lesion  
19 and/or appearance of new nerve thickening were taken as relapse. Any sudden redness,  
20 swelling of the lesion with or without new lesion especially during the first 6 to 12 months  
21 of follow up, was considered as late reaction. All such patients were first put on  
22 corticosteroids<sup>14</sup>. If there was no obvious change in morphology of lesion (inflammation) in  
23 4 weeks, the patients were considered as to have relapsed. If patient responded to 4 weeks  
24 corticosteroids, then it was recorded as reaction and not relapse.  
25  
26  
27  
28  
29  
30  
31  
32  
33

### 34 35 **Defining disability of Grade 1 and Grade 2**

36 Disability Grade 1 was defined as patient developing anesthesia in palm or sole tested with a ball  
37 point pen and Grade 2 as visible deformity in either Hand or Feet or eye (Lagophthalmas). During  
38 this time, all cases of clinical relapse, reaction and developing of disability (Grade 1 & Grade 2) were  
39 recorded after medical confirmation and necessary medical relief was either provided or referred  
40  
41  
42

### 43 44 **Ethical Approval and informed consent**

45 Ethical Approval was taken from Institutional ethical committee who was being informed  
46 periodically about the progress of the work. All the patients were informed about the possible side  
47 effects, remedies and benefits. Although the treatment given was WHO standard regimen but for  
48 reasons of follow up etc, the patients were asked to consent and then they were put on respective  
49 treatment. In case of children, consent of their parents was taken.  
50  
51  
52  
53

### 54 55 **Statistical methods**



1  
2  
3 The comparison of patients developing disability was done using survival analysis and Log-Rank test  
4 to test the significance<sup>15</sup> using SPSS v12 software and Fisher exact test or  $\chi^2$  test of significance used  
5 to compare proportions<sup>16</sup>.  
6  
7  
8  
9

## 10 Results

### 11 Demographic Characteristics of patients

12 The patients of all ages were detected in surveys. The mean age was 34.2 years (SEM=0.6).  
13 About half of total patients (49.7%) were aged 35 & above and only 12.5% were the child  
14 cases (<15 years). Male patients in this study accounted for 45.3% of the total 872 cases  
15 put on PB-MDT. At the time of survey, 51.8% patients were those who reported to acquire  
16 leprosy during last 12 months, 32.3% in last 12-36 months and rest had disease since over  
17 36 months. A total of 79.1% had upto 2 skin patches, 40.3% with 1 thickened nerve, 84.6%  
18 with borderline tuberculoid (BT) disease and only 0.3% (2 cases) were smear positive that  
19 too just 1+. Similar distribution is observed among those completed treatment and  
20 defaulters (Table 1).  
21  
22  
23  
24  
25  
26  
27  
28  
29  
30  
31

32 About 40% of the patients had 1 thicken nerve (main trunk or the cutaneous one) as  
33 observed in this study. The main nerve involved was ulnar (64.2%), Ulnat cutaneous (4.6%),  
34 Lateral popliteal (24%), Radial (0.9%), Radial cutaneous (3.2%), and rest others3.2%).  
35 About 2.5% had neuritic leprosy (no skin lesions).  
36  
37  
38  
39

### 40 Treatment completion, cure rate and reaction:

41 Of the total 872 patients who were put on PB-MDT treatment, 621(71.2%) completed their  
42 scheduled 6 months treatment and 251 (28.8%) defaulted at various stages of treatment.  
43 Among the defaulters, 70.1% defaulted early (within 3 months) and 29.9% during 3-5  
44 months treatment.  
45  
46  
47  
48

49 Among 621 completed treatments, only 599 could be followed up and 22 were lost to  
50 follow up (LFU). About 83% of the patients could be followed up for 3-8 years and some  
51 2.9% for over 8 years. A total of 545(91%) of the 599 were observed to be completely  
52 cured, 1.7% either not cured or partially cured and rest were observed to have either  
53  
54  
55  
56  
57  
58  
59  
60

1  
2  
3 relapsed (35), developed reaction (5/599) or developed disability of Grade 1 (5) or Grade 2  
4 (8) (Table 2).

### 7 **Incidence of Relapse**

9 The overall incidence of relapse was observed to be 1.3 per 100 person years (Figure 1). The  
10 incidence of relapse by age, although, did not change much but was observed to be slightly  
11 high in children (<15 years) and among older persons (>54 years). The incidence of relapse  
12 by sex, no. of patches, presence of nerve and delay in treatment also did not vary (Table 3).

### 18 **Incidence of disability among completed treatment vs. defaulters**

20 The crude incidence of disability was observed to be 2.2% in comparison to 2.02% among  
21 defaulters. The crude incidence by age varied significantly among completed treatment  
22 group ( $\chi^2 = 22.7, p=0.0001$ ) and no significant variation found in defaulters. Although no  
23 significant difference in crude incidence of disability was observed by sex, no. of patches  
24 and delay in treatment but by nerve status. Patient initially with no nerve developed  
25 disability more ( $\chi^2 = 4.1, p=0.043$ ) (Table 4).

26 Of the 592 patients completed treatment and followed up for over 4 years (Mean = 4.4  
27 years), 13 new cases of disability were observed during follow suggesting incidence of  
28 disability as 0.50 per 100 person years (PY) in comparison to 0.43 among defaulters (Table  
29 5, Figure 2). Among the defaulters, incidence of disability was 0.43 in early default and 0.41  
30 in late default.

### 36 **Discussions and Conclusion**

37 In the present study, 91% of the PB leprosy patients who completed treatment and  
38 followed up were completely cured. The reaction rate was observed to be very low (0.8%).

39 The occurrence of events like reaction, relapse and disability measures the effectiveness of  
40 any treatment regimen. In present cohort of PB leprosy, the relapse rates have been  
41 reported in some studies after MDT with a low rate in programme based data and high in  
42 closely monitored studies. Some studies had reported relapse rate of <1% to 6.9% in PB  
43 leprosy<sup>2-8</sup>. WHO also reported very low level of relapse<sup>17</sup> but based on country

1  
2  
3 reports. These reports have information not on all cases being given treatment but only  
4 those who report a relapse –resulting in very low reported relapses.  
5  
6

7 In the present study, overall relapse rate is observed as 1.3/100 persons years in the PB  
8 cohort observed during 2001-10 in Agra district. Most relapses (30/35) were observed 1-5  
9 years after releasing from treatment and almost 11.4% (4/35) beyond 5 years of follow up.  
10  
11 The relapse rates did not differ significantly by age, sex, delay at detection, clinical status  
12 and with nerve involvement.  
13  
14

15 Although it is difficult to qualify for high and low relapse rates but relapses do occur and  
16 can occur anytime after release from treatment<sup>13</sup>. More relapses may be seen if these  
17 patients are followed up for further longer period but extent is not easy to project. In  
18 many cases, the cause of relapse may be differential individuals' immunological response  
19 to mycobacteria. It would therefore be interesting to investigate the reason of relapses—is  
20 it insufficient treatment causing early relapse, persistent dormant mycobacteria leading to  
21 late relapse or immunological variations across populations giving mix of above two?  
22  
23

24 The incidence of disability was noticed 13 patients (5 Grade 1 & 8 Grade 2). Although crude  
25 incidence of 2.02% was noticed and significant variation by age ( $\chi^2=22.7$ ,  $p=0.0001$ ) and  
26 nerve involvement ( $\chi^2=4.1$ ,  $p=0.043$ ) but no significant difference observed by sex, number  
27 of patches and duration of delay in treatment. The overall incidence of disability was 0.50  
28 per 100 person years among the group of completing treatment and 0.43 per 100 person  
29 years among treatment defaulters (Table 5, Figure 2) with very little difference between  
30 early and late defaulters (Log rank test=0.23,  $p=0.63$ ). This study observed much lower  
31 crude incidence of disability than as observed in a pre-MDT time study that reported crude  
32 incidence of grade 1 & grade 2 disabilities as 6.7% & 5.2% respectively<sup>6</sup>.  
33  
34

35 The findings of present study once again confirms the findings of another cohort study on  
36 MB leprosy<sup>9</sup> that treatment status (complete vs. default) probably does not affect the risk  
37 of disability but initiation of treatment may do so. This is beside the fact that at what stage  
38 treatment is taken after the disease starts progressing. However, some early cases of grade  
39 1 disability may get altered to normal<sup>6</sup> but many may advance disability to grade 2. This is  
40 an important feature of leprosy and may be the result of already set-in pathways for  
41  
42  
43  
44  
45  
46  
47  
48  
49  
50  
51  
52  
53  
54  
55  
56  
57  
58  
59  
60

1  
2  
3 disabilities. Therefore more studies are required to understand and assess the cause of  
4 these pathways to disabilities.  
5  
6  
7  
8  
9

10  
11 **Acknowledgement:** Authors gratefully acknowledges the help extended by the institute by  
12 providing internal grant for the study. Thanks are also due to all patients who cooperated in the  
13 study and the paramedical workers and District leprosy officer for the support.  
14

15  
16 **Contributors:** Although all authors were responsible for the conception, design and acquisition of  
17 data, drafting, revising and final approval of the article. AK played the lead role in planning,  
18 conducting, supervising field study, analysis and report writing; AG for clinical evaluation and BKG  
19 for clinical monitoring and report preparation.  
20  
21

22  
23 **Funding :** This study was supported by an institutional grant from the National JALMA Institute for  
24 Leprosy, Taj Ganj, Agra. No specific funding was asked from any external agency.  
25

26 **Conflict of interests:** None  
27

28 **Patient Consent:** obtained  
29

30 **Ethical Approval** was granted by the institutional ethical committee, which was being informed  
31 periodically about the progress of the work.  
32  
33  
34  
35  
36  
37  
38  
39  
40  
41  
42  
43  
44  
45  
46  
47  
48  
49  
50  
51  
52  
53  
54  
55  
56  
57  
58  
59  
60

1  
2  
3  
4  
5  
6  
7  
8  
9  
10  
11  
12  
13  
14  
15  
16  
17  
18  
19  
20  
21  
22  
23  
24  
25  
26  
27  
28  
29  
30  
31  
32  
33  
34  
35  
36  
37  
38  
39  
40  
41  
42  
43  
44  
45  
46  
47  
48  
49  
50  
51  
52  
53  
54  
55  
56  
57  
58  
59  
60

| Characteristics                 | Patients on W.H.O. MDT (872) |                          |                          |
|---------------------------------|------------------------------|--------------------------|--------------------------|
|                                 | %Total (872)                 | Completed Treatment(621) | Defaulted treatment(251) |
| Age ≤14                         | 12.5                         | 13.8                     | 9.2                      |
| 15-34                           | 37.8                         | 36.9                     | 40.2                     |
| 35-54                           | 35.6                         | 36.4                     | 33.5                     |
| >54                             | 14.1                         | 12.9                     | 17.1                     |
| Mean (SEM)                      | 34.2(0.6)                    | 33.8(0.7)                | 35.3(1.1)                |
| Sex Male                        | 45.3                         | 48.1                     | 38.2                     |
| Female                          | 54.7                         | 51.9                     | 61.8                     |
| Delay in detection (months) ≤12 | 51.8                         | 49.6                     | 57.4                     |
| 13-36                           | 32.3                         | 34.0                     | 28.3                     |
| >36                             | 15.8                         | 16.4                     | 14.3                     |
| Patches 0-2                     | 79.1                         | 78.1                     | 81.7                     |
| 3-5                             | 20.9                         | 21.9                     | 18.3                     |
| Nerves 0                        | 59.7                         | 58.3                     | 63.3                     |
| 1                               | 40.3                         | 41.7                     | 36.7                     |
| Clinical status* I/TT           | 12.9                         | 12.7                     | 13.5                     |
| BT/BTR                          | 84.6                         | 85.0                     | 83.7                     |
| N                               | 2.5                          | 2.3                      | 2.8                      |
| Smear +ve                       | 0.2                          | 0.3                      | 0                        |
| -ve                             | 18.4                         | 18.8                     | 17.1                     |
| Not done                        | 81.4                         | 80.9                     | 82.9                     |

\*I (Indeterminate), TT(Tuberculoid), BT(Borderline Tuberculoid), BTR(BT with initial Type 1 reaction), N(Neurotic without skin lesions)

40  
41  
42  
43  
44  
45  
46  
47  
48  
49  
50  
51  
52  
53  
54  
55  
56  
57  
58  
59  
60

| Clinical status   | Duration of Follow up (Years) |     |     |     |    | Total(%)   |
|-------------------|-------------------------------|-----|-----|-----|----|------------|
|                   | <1                            | 1-3 | 3-5 | 5-8 | >8 |            |
| Complete Cure     | 18                            | 40  | 357 | 114 | 16 | 545 (91.0) |
| Partial /Not Cure | 5                             | 3   | 2   | 0   | 0  | 10(1.7)    |
| Relapse           | 1                             | 11  | 12  | 2   | 0  | 26(4.3)    |
| Relapse+Reaction  | 0                             | 0   | 2   | 0   | 0  | 2 (0.3)    |
| Relapse+Grade 1   | 0                             | 0   | 1   | 1   | 1  | 3(0.5)     |
| Relapse+Grade 2   | 0                             | 2   | 2   | 0   | 0  | 4(0.7)     |
| Only Grade 1      | 0                             | 0   | 1   | 0   | 0  | 1(0.2)     |
| Only Grade 2      | 0                             | 2   | 2   | 0   | 0  | 4(0.7)     |
| Not cured+Grade 1 | 0                             | 0   | 1   | 0   | 0  | 1(0.2)     |
| Type 1 Reaction   | 1                             | 2   | 0   | 0   | 0  | 3(0.5)     |
| Total             | 25                            | 60  | 380 | 117 | 17 | 599        |

|   |         |          |      |          |     |         |
|---|---------|----------|------|----------|-----|---------|
| % | 4.<br>2 | 10.<br>0 | 63.4 | 19.<br>5 | 2.9 | (100.0) |
|---|---------|----------|------|----------|-----|---------|

Table 3: Incidence of relapses/100 person years at risk

|                           | Cases | Mean Person Years | Person Years at risk (PYAR) | No. of Relapses | Relapse/100 PYAR |
|---------------------------|-------|-------------------|-----------------------------|-----------------|------------------|
| Age <15                   | 81    | 4.62              | 374.4                       | 06              | 1.6              |
| 15-34                     | 221   | 4.23              | 933.8                       | 11              | 1.2              |
| 35-54                     | 220   | 4.53              | 996.7                       | 10              | 1.0              |
| >54                       | 77    | 4.31              | 331.7                       | 08              | 2.4              |
| Total                     | 599   | 4.39              | 2636.4                      | 35              | 1.3              |
| Sex Male                  | 287   | 4.27              | 1226.9                      | 16              | 1.3              |
| Female                    | 312   | 4.52              | 1409.5                      | 19              | 1.4              |
| Delay in Treatment (Year) |       |                   |                             |                 |                  |
| Upto 1                    | 301   | 4.37              | 1315.2                      | 17              | 1.3              |
| 1-2                       | 201   | 4.22              | 850.8                       | 11              | 1.3              |
| >3                        | 97    | 4.85              | 470.4                       | 07              | 1.5              |
| Patches 0-2               | 466   | 4.37              | 2037.7                      | 28              | 1.4              |
| 3-5                       | 133   | 4.50              | 598.7                       | 07              | 1.2              |
| Nerves 0                  | 344   | 4.24              | 1458.7                      | 21              | 1.4              |
| 1                         | 255   | 4.62              | 1177.7                      | 14              | 1.2              |

Table 4: Crude incidence of disability among PB Leprosy

| Factor             | Completed Treatment |      | Defaulters |      | X <sup>2</sup> and p-value |            |
|--------------------|---------------------|------|------------|------|----------------------------|------------|
|                    | Cases               | %CID | Cases      | %CID | Completed Treatment        | Defaulters |
| Age <15            | 81                  | 0    | 20         | 0    | 22.7, 0.0001               | NS         |
| 15-34              | 217                 | 0.46 | 71         | 1.41 |                            |            |
| 35-54              | 219                 | 2.28 | 72         | 2.78 |                            |            |
| >54                | 75                  | 9.33 | 35         | 2.86 |                            |            |
| Total              | 592                 | 2.20 | 198        | 2.02 |                            |            |
| Sex Male           | 280                 | 1.74 | 66         | 0    | NS                         | NS         |
| Female             | 312                 | 2.56 | 132        | 3.01 |                            |            |
| Patch 0-2          | 459                 | 2.18 | 164        | 1.83 | NS                         | NS         |
| 3-5                | 133                 | 2.26 | 34         | 2.94 |                            |            |
| Nerve 0            | 344                 | 1.16 | 127        | 2.36 | 4.1, 0.043                 | NS         |
| 1                  | 248                 | 3.63 | 71         | 1.41 |                            |            |
| Delay in Treatment |                     |      |            |      |                            |            |
| <12 Mo             | 299                 | 1.67 | 115        | 2.61 | NS                         | NS         |
| 13-36              | 200                 | 3.00 | 55         | 0    |                            |            |
| >36                | 93                  | 2.15 | 28         | 3.57 |                            |            |

Table 5: Incidence of disability/100 person years at risk

|                         | Cases | Mean Person Years | Person Years at risk (PYAR) | new disability cases | incidence/ 100 PYAR |
|-------------------------|-------|-------------------|-----------------------------|----------------------|---------------------|
| Completed MDT Treatment | 592   | 4.40              | 2597.4                      | 13                   | 0.50*               |
| Defaulters of MDT       | 198   | 4.72              | 933.7                       | 4                    | 0.43*               |
| Early (<3 months)       | 142   | 4.87              | 691.4                       | 3                    | 0.43                |
| Late (3-5 month)        | 56    | 4.33              | 242.3                       | 1                    | 0.41                |
| All                     | 789   | 4.48              | 3531.1                      | 17                   | 0.48                |

\*Log rank test= 0.23, p=0.63

## Reference

1. Kaimal S, Thapa DM. Relapse in leprosy. *Ind J Derm Ven Lep* 2009; 75(2): 126-135.
2. Becx-Bleumink M. Relapse among leprosy patients treated with multidrug therapy. Experience in the leprosy control programme of ALERT in Ethiopia; practical difficulties with diagnosing relapse, operational procedures and criteria for diagnosing relapse. *Int J Lepr* 1992;60:421-435.
3. The Leprosy Unit, WHO. Risk of relapse in leprosy. *Indian J Lepr* 1995;67:13-26.
4. Lobo D. Treatment failures with multidrug treatment. *Lepr Rev* 1992;63:93s-98s.
5. Abdul KS. An analysis of relapsed leprosy cases. *Ind J Derm Ven Lep* 2000; 66(3): 126-128.
6. Pandian TD, Sithambram M, Bharathi R, et al. A study of relapse in non-lepromatous and intermediate groups of leprosy. *Ind J Lepr* 1985; 57(1):149-158.
7. Ali MK, Thorat DM, Subramanian M, Parthasarathy G, Selvaraj U, Prabhakar V. A study on trend of relapse in leprosy and factors influencing relapse. *Indian J Lepr* 2005;77:105-15.
8. Boerrigter G, Ponnighaus JM, Fine PE, et al. Four-year follow up results of a WHO-recommended multiple-drug regimen in paucibacillary leprosy patients in Malawi. *Int J Lepr* 1991;59:255-61.
9. Kumar A, Girdhar A, Girdhar BK. Risk of developing disability in pre and post multidrug therapy treatment among multibacillary leprosy: Agra MB Cohort study. **BMJ open** 2012;2:e000361.doi:10.1136/bmjopen-2011-000361.
10. Kumar A, Yadav VS, Girdhar A, et al. Some Epidemiological Observations on Leprosy in Agra, India. *Int J Lepr* 2001, 69(3):234-240.
11. Kumar A, Girdhar A, Girdhar BK. Epidemiology of Leprosy in Urban Agra, India. *Lepr Rev*, 2003; 74:31-34.
12. Kumar A, Girdhar A, Girdhar BK. Prevalence of leprosy in Agra district (U.P.) India during 2001-2003. *Int J Lepr* ,2005, 73(2):115-121.
13. Kumar A, Girdhar A, Chakma JC, et al. A rapid survey for Leprosy in Agra District (2004-06): Epidemiological Observations. *J Commun Dis*; 2008,40(4): 277-284
14. Ramachandran A, Seshadri PS. Relapses or reversal reaction: the case for a therapeutic trial of steroids. *Lepr Rev* 1988;59:271-272.
15. Statistical Programme for Social Scientists (SPSS), v.12. USA.1999.

16. Le Chap T. Analysis of Categorical data. USA: John Wiley & Sons, 1988.
17. WHO Expert Committee on Leprosy. World Health Organization Tech Rep Ser 1998;874:1-43.

For peer review only



STROBE 2007 (v4) Statement—Checklist of items that should be included in reports of cohort studies

| Section/Topic             | Item # | Recommendation                                                                                                                                                                       | Reported on page # |
|---------------------------|--------|--------------------------------------------------------------------------------------------------------------------------------------------------------------------------------------|--------------------|
| Title and abstract        | 1      | (a) Indicate the study’s design with a commonly used term in the title or the abstract                                                                                               | 1                  |
|                           |        | (b) Provide in the abstract an informative and balanced summary of what was done and what was found                                                                                  | 2                  |
| <b>Introduction</b>       |        |                                                                                                                                                                                      |                    |
| Background/rationale      | 2      | Explain the scientific background and rationale for the investigation being reported                                                                                                 | 3                  |
| Objectives                | 3      | State specific objectives, including any prespecified hypotheses                                                                                                                     | 3                  |
| <b>Methods</b>            |        |                                                                                                                                                                                      |                    |
| Study design              | 4      | Present key elements of study design early in the paper                                                                                                                              | 4-6                |
| Setting                   | 5      | Describe the setting, locations, and relevant dates, including periods of recruitment, exposure, follow-up, and data collection                                                      | 4                  |
| Participants              | 6      | (a) Give the eligibility criteria, and the sources and methods of selection of participants. Describe methods of follow-up                                                           | 4                  |
|                           |        | (b) For matched studies, give matching criteria and number of exposed and unexposed                                                                                                  |                    |
| Variables                 | 7      | Clearly define all outcomes, exposures, predictors, potential confounders, and effect modifiers. Give diagnostic criteria, if applicable                                             | 5                  |
| Data sources/ measurement | 8*     | For each variable of interest, give sources of data and details of methods of assessment (measurement). Describe comparability of assessment methods if there is more than one group | 5-6                |
| Bias                      | 9      | Describe any efforts to address potential sources of bias                                                                                                                            | none               |
| Study size                | 10     | Explain how the study size was arrived at                                                                                                                                            | 4                  |
| Quantitative variables    | 11     | Explain how quantitative variables were handled in the analyses. If applicable, describe which groupings were chosen and why                                                         | 5-6                |
| Statistical methods       | 12     | (a) Describe all statistical methods, including those used to control for confounding                                                                                                | 6                  |
|                           |        | (b) Describe any methods used to examine subgroups and interactions                                                                                                                  |                    |
|                           |        | (c) Explain how missing data were addressed                                                                                                                                          | Not applicable     |
|                           |        | (d) If applicable, explain how loss to follow-up was addressed                                                                                                                       | 5                  |
|                           |        | (e) Describe any sensitivity analyses                                                                                                                                                |                    |
| <b>Results</b>            |        |                                                                                                                                                                                      |                    |

|                          |     |                                                                                                                                                                                                              |     |
|--------------------------|-----|--------------------------------------------------------------------------------------------------------------------------------------------------------------------------------------------------------------|-----|
| Participants             | 13* | (a) Report numbers of individuals at each stage of study—eg numbers potentially eligible, examined for eligibility, confirmed eligible, included in the study, completing follow-up, and analysed            | 6   |
|                          |     | (b) Give reasons for non-participation at each stage                                                                                                                                                         | 5-6 |
|                          |     | (c) Consider use of a flow diagram                                                                                                                                                                           | 5   |
| Descriptive data         | 14* | (a) Give characteristics of study participants (eg demographic, clinical, social) and information on exposures and potential confounders                                                                     | 7   |
|                          |     | (b) Indicate number of participants with missing data for each variable of interest                                                                                                                          | 5-6 |
|                          |     | (c) Summarise follow-up time (eg, average and total amount)                                                                                                                                                  | 8   |
| Outcome data             | 15* | Report numbers of outcome events or summary measures over time                                                                                                                                               | 7-8 |
| Main results             | 16  | (a) Give unadjusted estimates and, if applicable, confounder-adjusted estimates and their precision (eg, 95% confidence interval). Make clear which confounders were adjusted for and why they were included | 7-8 |
|                          |     | (b) Report category boundaries when continuous variables were categorized                                                                                                                                    | 7-8 |
|                          |     | (c) If relevant, consider translating estimates of relative risk into absolute risk for a meaningful time period                                                                                             |     |
| Other analyses           | 17  | Report other analyses done—eg analyses of subgroups and interactions, and sensitivity analyses                                                                                                               |     |
| <b>Discussion</b>        |     |                                                                                                                                                                                                              |     |
| Key results              | 18  | Summarise key results with reference to study objectives                                                                                                                                                     | 8-9 |
| <b>Limitations</b>       |     |                                                                                                                                                                                                              |     |
| Interpretation           | 20  | Give a cautious overall interpretation of results considering objectives, limitations, multiplicity of analyses, results from similar studies, and other relevant evidence                                   | 8-9 |
| Generalisability         | 21  | Discuss the generalisability (external validity) of the study results                                                                                                                                        | 8-9 |
| <b>Other information</b> |     |                                                                                                                                                                                                              |     |
| Funding                  | 22  | Give the source of funding and the role of the funders for the present study and, if applicable, for the original study on which the present article is based                                                | 10  |

\*Give information separately for cases and controls in case-control studies and, if applicable, for exposed and unexposed groups in cohort and cross-sectional studies.

**Note:** An Explanation and Elaboration article discusses each checklist item and gives methodological background and published examples of transparent reporting. The STROBE checklist is best used in conjunction with this article (freely available on the Web sites of PLoS Medicine at <http://www.plosmedicine.org/>, Annals of Internal Medicine at <http://www.annals.org/>, and Epidemiology at <http://www.epidem.com/>). Information on the STROBE Initiative is available at [www.strobe-statement.org](http://www.strobe-statement.org).



**6 months fixed duration multidrug therapy in paucibacillary leprosy: Risk of relapse and disability in Agra PB cohort study**

|                                 |                                                                                                                                                                                                                                                                                                         |
|---------------------------------|---------------------------------------------------------------------------------------------------------------------------------------------------------------------------------------------------------------------------------------------------------------------------------------------------------|
| Journal:                        | <i>BMJ Open</i>                                                                                                                                                                                                                                                                                         |
| Manuscript ID:                  | bmjopen-2012-001403.R2                                                                                                                                                                                                                                                                                  |
| Article Type:                   | Research                                                                                                                                                                                                                                                                                                |
| Date Submitted by the Author:   | 14-Jul-2012                                                                                                                                                                                                                                                                                             |
| Complete List of Authors:       | KUMAR, ANIL; National Institute for Leprosy & Other Mycobacterial Diseases, Biostatistics and Epidemiology<br>GIRDHAR, ANITA; National Institute for Leprosy & Other Mycobacterial Diseases,, CLINICAL<br>Girdhar, Bhavneswar; National Institute for Leprosy & Other Mycobacterial Diseases,, CLINICAL |
| <b>Primary Subject Heading</b>: | Health services research                                                                                                                                                                                                                                                                                |
| Secondary Subject Heading:      | Epidemiology, Evidence based practice, Pharmacology and therapeutics, Infectious diseases, Public health                                                                                                                                                                                                |
| Keywords:                       | Health informatics < BIOTECHNOLOGY & BIOINFORMATICS, EPIDEMIOLOGY, Dermatological epidemiology < DERMATOLOGY, CHEMOTHERAPY                                                                                                                                                                              |
|                                 |                                                                                                                                                                                                                                                                                                         |

SCHOLARONE™  
Manuscripts

Only

1  
2  
3  
4  
5 6 months fixed duration multidrug therapy in paucibacillary leprosy:  
6  
7  
8 Risk of relapse and disability in Agra PB cohort study.  
9

10  
11  
12 by

13  
14 **Dr. Anil Kumar,**

15  
16  
17 **Dr. Anita Girdhar,**

18  
19  
20 **Dr BK Girdhar**

21  
22  
23 **National JALMA Institute for Leprosy,**

24  
25  
26  
27 **Taj Ganj, Agra -282001**

28  
29  
30 **dranil250158@gmail.com**  
31  
32  
33  
34  
35  
36  
37  
38  
39  
40  
41  
42  
43  
44  
45  
46  
47  
48  
49  
50  
51  
52  
53  
54  
55  
56  
57  
58  
59  
60

## Abstract

**Background:** Many studies focused on multidrug therapy for MB leprosy and rarely on long term outcome of paucibacillary (PB) leprosy having recommendation of therapy for 6 months fixed duration therapy for PB patients. Studies on measuring risk of disability are rare. Present study is to assess the cure; default, relapse and disability in a prospective cohort of PB leprosy during follow up of >4 years after treatment.

**Design:** Prospective

**Setting:** Primary in our field area of Agra District

**Participants:** 920 paucibacillary leprosy patients entering the study, 621 completed treatment, 599 followed finally including 271 males, no ethnic differentiation, patients of all age groups except children below 5 years and old persons above 70 years were not included.

**Treatment:** 6 months fix duration multidrug therapy (MDT) as recommended by W.H.O.

**Primary and Secondary outcomes:** Treatment completion, cure, relapse and development of disability based on clinical assessment by well experienced doctors.

**Statistical Methods:** Data has been analyzed using SPSS software, risk is computed as incidence per 100 person years and test of significance used.

**Results:** Study reports 91% cure rate. Incidence of relapse was 1.3/100 person years with no significant variation by age, sex, delay in detection, patches, Nerves. Crude incidence of disability was 2.2% and varied significantly by age and nerve thickening but not by sex, number of patches, nerves and delay in treatment. Incidence of disability was 0.50/100 person years in treatment completed and 0.43 among defaulters.

**Conclusion:** Study concludes that relapses do occur after MDT treatment but at the level of 1-2%, incidence of disability remains low (<1/100 PY) in PB leprosy. Low incidence of relapse and disability suggests that 6 months therapy is quite effective. However further improvement may help to improve its efficacy. Longer follow up may add to efficacy measures.

## Introduction

Leprosy is unique in terms of the nature of the causative organism, the chronicity of the disease, its prolonged treatment and the definitions of cure and relapse. The principal mode of assessing the effectiveness of therapeutic regimens in leprosy is the relapse rate<sup>1</sup>. The important predisposing factors for relapse include the presence of persisters bacilli, monotherapy, inadequate or irregular therapy, presence of multiple skin lesions and/or thickened nerves and lepromin negativity. The conventional methods of confirming activity or relapse in an infectious disease have limited utility in leprosy because of the difficulty in demonstrating bacilli in paucibacillary (PB) cases and absence of a method of *in vitro* cultivation of *M. leprae*. Bacteriological parameters are useful in smear positive multibacillary (MB) leprosy, whereas in PB leprosy, the criteria for relapse depend primarily on clinical features since even histological examination cannot clearly distinguish between reaction and relapse<sup>2</sup>.

There are wide variations in estimates of relapse rates in different regions. The risk of relapse from programme based data were reported<sup>2-4</sup> to be low from 0.29% to 1.1% and in closely monitored studies it was estimated as 1% to 6.9% for PB leprosy patients after stopping MDT<sup>5,6</sup>. Although most of these studies provided crude estimates of relapse but a few also estimated using person-years of observation, giving relapse rates of 0.65 to 3.0 per 100 person years for PB leprosy<sup>5,7,8</sup>.

One of the reasons for low relapse rate was that follow up was done usually for shorter intervals after therapy. Beside relapses in PB leprosy, there is hardly any study in literature reporting risk of developing disability but one<sup>6</sup> based on pre-MDT era reported that 6.7% developed Grade 1 and another 5.2% Grade 2 disability. However, one recent study based on multidrug treatment had given estimates of risk of developing disability of 2.74/100 person years in multibacillary leprosy<sup>9</sup>. Therefore, more studies on long term follow up were required to assess the risk of relapse and disability rate in the cohort of patients treated with 6 months fixed duration therapy and thus the present study was undertaken in cohort PB leprosy patients from field surveys in Agra district –namely Agra cohort, with the objectives to assess the risk of relapse and disability rate beside the extent of treatment completion and cure rate.

## Design and Methods

### Study site, field setting and duration of study

The study was started in our field area in Agra District of Uttar Pradesh on patients detected in field surveys under several studies on prevalence of leprosy during 2001-2006<sup>10-13</sup>. The Agra District is located 200 KM away from Delhi and spread in the radius of 100 KM on either side in length and borders with district Itawa & Firozabad on eastern side, Mathura & Bharatpur on north-west side and Gwalior & Dholpur on south side. Several studies were undertaken since the district was highly endemic for leprosy with prevalence of 16.4/10000 during 2001-03 and 7/10000 during 2004-06. The present study is based on patients detected in such surveys and all patients were followed up till April 2011.

### Inclusion/Exclusion criterion of Patients for the study

The study has been conducted in patients detected in the field survey in Agra district during 2001-06. Newly detected leprosy patients diagnosed clinically as paucibacillary (PB) leprosy were taken for the study. This included patients with upto 5 skin lesions, either erythematous or hypo-pigmented with definite impairment or loss of sensations (tested with ball point pen) and/or 1 thickened nerves. None of the patients had taken leprosy treatment earlier. Children below 5 and adults above 70 were although treated as per norms but not included in the study and so were the pregnant and lactating women.

### Cohort size and treatment allocation

During 2001-2006 in Agra district, several field surveys were undertaken to detect leprosy cases. In these surveys, a total of 1050 paucibacillary (PB) leprosy cases were detected. After excluding cases given ROM in the randomized trial, rest was put on W.H.O. MDT as the cases were detected in ongoing surveys. Of the 920 PB cases, 48 did not start the treatment (2 for pregnancy, 2 old aged, 44 simply refused). After this, 872 cases on PB-MDT, 251 (28.8%) discontinued (defaulted) treatments at various durations and reasons. Therefore, a cohort of 599 (96.5%), out of 621 PB patients completed treatment could be

followed up for a mean duration of 4.39(SD:1.6) years after completion of MDT treatment. Present study is based on this cohort of 599 cases (see flow chart).

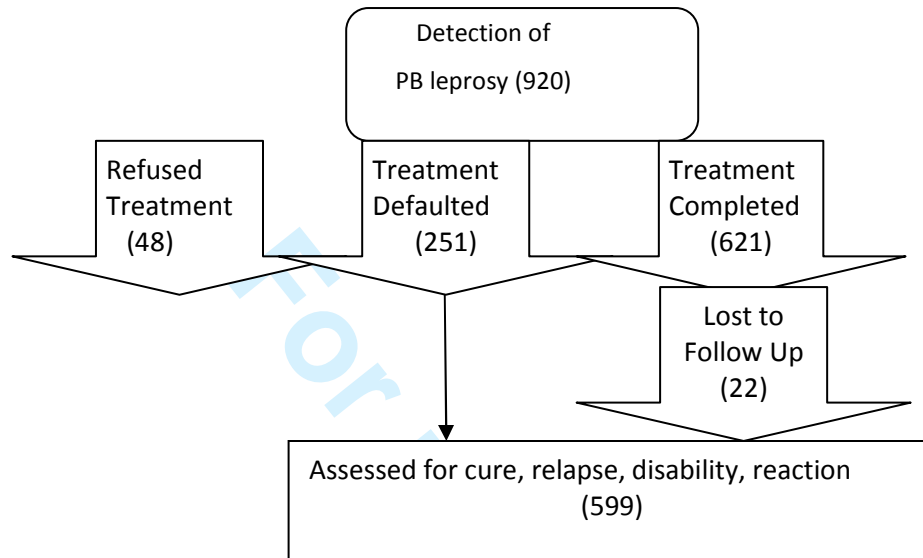

At the time of starting treatment, all the patients were informed about disease, its implications, treatment, possible side effects, remedies and benefits. Although the treatment given was WHO standard regimen as in routine Government leprosy control programme but for reasons of follow up etc patients were asked to consent and then they were put on respective treatment. In case of children, consent of their parents was taken.

### Treatment

W.H.O. supplied standard PB/MDT packs were used for the study and appropriate W.H.O. recommended doses (Available in blister packs) were given to Children aged 5-14 and adults (aged >14). Monthly PB-MDT was given, with supervisory dose under supervision and for rest of days patients were guided to take daily treatment doses of Dapsone.

### Follow-up and assessment

Patients were visited every month till the completion of treatment for drug intake, clinical conditions and side effects. However, formal assessment of each available patient was made every 6 months for 5 years and annually thereafter. Lesion activity- erythema, infiltration and size, reaction, any new lesion and / or new nerve thickening or any deformity was recorded in consultation with the medical doctor who was apart of the



1  
2  
3 study. Cure of the disease was defined as complete healing of the lesion or patch becoming  
4 flat hypopigmented with decrease in size of the lesion and/or regain of sensations. Loss to  
5 follow was defined when patients could not be assessed for fairly long time.  
6  
7

### 8 9 **Defining Defaulter**

10 A patient who did not complete scheduled 6 months MDT to be able to declare cured. An  
11 early defaulter is the one who did not have more than 2 months of MDT and late defaulter  
12 is with 3 to 5 months MDT.  
13  
14

### 15 16 **Defining Relapse or Reaction**

17 The case of relapse was confirmed by a clinician with >30 years experience in leprosy.  
18 Gradual or insidious appearance of new lesion(s) or definite increase in size of the lesion  
19 and/or appearance of new nerve thickening were taken as relapse. Any sudden redness,  
20 swelling of the lesion with or without new lesion especially during the first 6 to 12 months  
21 of follow up, was considered as late reaction. All such patients were first put on  
22 corticosteroids<sup>14</sup>. If there was no obvious change in morphology of lesion (inflammation) in  
23 4 weeks, the patients were considered as to have relapsed. If patient responded to 4 weeks  
24 corticosteroids, then it was recorded as reaction and not relapse.  
25  
26  
27  
28  
29  
30  
31  
32  
33

### 34 35 **Defining disability of Grade 1 and Grade 2**

36 Disability Grade 1 was defined as patient developing anesthesia in palm or sole tested with a ball  
37 point pen and Grade 2 as visible deformity in either Hand or Feet or eye (Lagophthalmas). During  
38 this time, all cases of clinical relapse, reaction and developing of disability (Grade 1 & Grade 2) were  
39 recorded after medical confirmation and necessary medical relief was either provided or referred  
40  
41  
42

### 43 44 **Ethical Approval and informed consent**

45 Ethical Approval was taken from Institutional ethical committee who was being informed  
46 periodically about the progress of the work. All the patients were informed about the possible side  
47 effects, remedies and benefits. Although the treatment given was WHO standard regimen but for  
48 reasons of follow up etc, the patients were asked to consent and then they were put on respective  
49 treatment. In case of children, consent of their parents was taken.  
50  
51  
52  
53

### 54 55 **Statistical methods**

1  
2  
3 The comparison of patients developing disability was done using survival analysis and Log-Rank test  
4 to test the significance<sup>15</sup> using SPSS v12 software and Fisher exact test or  $\chi^2$  test of significance used  
5 to compare proportions<sup>16</sup>.  
6  
7  
8  
9

## 10 Results

### 11 Demographic Characteristics of patients

12 The patients of all ages were detected in surveys. The mean age was 34.2 years (SEM=0.6).  
13 About half of total patients (49.7%) were aged 35 & above and only 12.5% were the child  
14 cases (<15 years). Male patients in this study accounted for 45.3% of the total 872 cases  
15 put on PB-MDT. At the time of survey, 51.8% patients were those who reported to acquire  
16 leprosy during last 12 months, 32.3% in last 12-36 months and rest had disease since over  
17 36 months. A total of 79.1% had upto 2 skin patches, 40.3% with 1 thickened nerve, 84.6%  
18 with borderline tuberculoid (BT) disease and only 0.3% (2 cases) were smear positive that  
19 too just 1+. Similar distribution is observed among those completed treatment and  
20 defaulters (Table 1).  
21  
22  
23  
24  
25  
26  
27  
28  
29  
30  
31

32 About 40% of the patients had 1 thicken nerve (main trunk or the cutaneous one) as  
33 observed in this study. The main nerve involved was Ulnar (64.2%), ulnar cutaneous (4.6%),  
34 Lateral popliteal (24%), Radial (0.9%), Radial cutaneous (3.2%), and rest others 3.2%).  
35 About 2.5% had neuritic leprosy (no skin lesions).  
36  
37  
38  
39

### 40 Treatment completion, cure rate and reaction:

41 Of the total 872 patients who were put on PB-MDT treatment, 621(71.2%) completed their  
42 standard 6 months treatment and 251 (28.8%) defaulted at various stages of treatment.  
43 Among the defaulters, 70.1% defaulted early (within 3 months) and 29.9% during 3-5  
44 months treatment.  
45  
46  
47  
48

49 Among 621 completed treatments, only 599 could be followed up and 22 were lost to  
50 follow up (LFU). About 83% of the patients could be followed up for 3-8 years and some  
51 2.9% for over 8 years. A total of 545(91%) of the 599 were observed to be completely  
52 cured, 1.7% either not cured or partially cured and rest were observed to have either  
53  
54  
55  
56  
57  
58  
59  
60

relapsed (35), developed reaction (5/599) or developed disability of Grade 1 (5) or Grade 2 (8) (Table 2).

### **Incidence of Relapse**

The overall incidence of relapse was observed to be 1.3 per 100 person years (Figure 1). The incidence of relapse by age, although, did not change much but was observed to be slightly high in children (<15 years) and among older persons (>54 years). The incidence of relapse by sex, no. of patches, presence of nerve and delay in treatment also did not vary (Table 3).

### **Incidence of disability among completed treatment vs. defaulters**

The crude incidence of disability was observed to be 2.2% in comparison to 2.02% among defaulters. The crude incidence by age varied significantly among completed treatment group ( $\chi^2 = 22.7, p=0.0001$ ) and no significant variation found in defaulters. Although no significant difference in crude incidence of disability was observed by sex, no. of patches and delay in treatment but by nerve status. Patient initially with no nerve developed disability more ( $\chi^2 = 4.1, p=0.043$ ) (Table 4).

Of the 592 patients completed treatment and followed up for over 4 years (Mean = 4.4 years), 13 new cases of disability were observed during follow suggesting incidence of disability as 0.50 per 100 person years (PY) in comparison to 0.43 among defaulters (Table 5, Figure 2). Among the defaulters, incidence of disability was 0.43 in early default and 0.41 in late default.

### **Discussions and Conclusion**

In the present study, 91% of the PB leprosy patients who completed treatment and followed up were completely cured. The reaction rate was observed to be very low (0.8%).

The occurrence of events like reaction, relapse and disability measures the effectiveness of any treatment regimen. In present cohort of PB leprosy, the relapse rates have been reported in some studies after MDT with a low rate in programme based data and high in closely monitored studies. Some studies had reported relapse rate of <1% to 6.9% in PB leprosy<sup>2-8</sup>. WHO also reported very low level of relapse<sup>17</sup> but based on country reports.

1  
2  
3 These reports have information not on all cases being given treatment but only those who  
4 report a relapse –resulting in very low reported relapses.  
5

6  
7 In the present study, overall relapse rate is observed as 1.3/100 persons years in the PB  
8 cohort observed during 2001-10 in Agra district. Most relapses (30/35) were observed 1-5  
9 years after releasing from treatment and almost 11.4% (4/35) beyond 5 years of follow up.  
10 The relapse rates did not differ significantly by age, sex, delay at detection, clinical status  
11 and with nerve involvement.  
12

13  
14 Although it is difficult to qualify for high and low relapse rates but relapses do occur and  
15 can occur anytime after release from treatment<sup>13</sup>. More relapses may be seen if these  
16 patients are followed up for further longer period but extent is not easy to project. In  
17 many cases, the cause of relapse may be differential individuals' immunological response  
18 to mycobacteria. It would therefore be interesting to investigate the reason of relapses—is  
19 it insufficient treatment causing early relapse, persistent dormant mycobacteria leading to  
20 late relapse or immunological variations across populations giving mix of above two?  
21

22  
23 The incidence of disability was noticed 13 patients (5 Grade 1 & 8 Grade 2). Although crude  
24 incidence of 2.02% was noticed and significant variation by age ( $\chi^2=22.7$ ,  $p=0.0001$ ) and  
25 nerve involvement ( $\chi^2=4.1$ ,  $p=0.043$ ) but no significant difference observed by sex, number  
26 of patches and duration of delay in treatment. The overall incidence of disability was 0.50  
27 per 100 person years among the group of completing treatment and 0.43 per 100 person  
28 years among treatment defaulters (Table 5, Figure 2) with very little difference between  
29 early and late defaulters (Log rank test=0.23,  $p=0.63$ ). This study observed much lower  
30 crude incidence of disability than as observed in a pre-MDT time study that reported crude  
31 incidence of grade 1 & grade 2 disabilities as 6.7% & 5.2% respectively<sup>6</sup>.  
32

33  
34 The findings of present study once again confirms the findings of another cohort study on  
35 MB leprosy<sup>9</sup> that treatment status (complete vs. default) probably does not affect the risk  
36 of disability but initiation of treatment may do so. This is beside the fact that at what stage  
37 treatment is taken after the disease starts progressing. However, some early cases of grade  
38 1 disability may get altered to normal<sup>6</sup> but many may advance disability to grade 2. This is  
39 an important feature of leprosy and may be the result of already set-in pathways for  
40  
41  
42  
43  
44  
45  
46  
47  
48  
49  
50  
51  
52  
53  
54  
55  
56  
57  
58  
59  
60

1  
2  
3 disabilities. Therefore more studies are required to understand and assess the cause of  
4 these pathways to disabilities.  
5  
6

7 **Limitation of the study:** One of the limitations of the study design is that not all patients  
8 could be submitted to skin smear due to their non-cooperation and histopathology was not  
9 planned and thus only clinical classification based on long experience of Leprologists in the  
10 study was used.  
11  
12  
13

14  
15  
16 **Acknowledgement:** Authors gratefully acknowledges the help extended by the institute by  
17 providing internal grant for the study. Thanks are also due to all patients who cooperated in the  
18 study and the paramedical workers and District leprosy officer for the support.  
19  
20

21 **Contributors:** Although all authors were responsible for the conception, design and acquisition of  
22 data, drafting, revising and final approval of the article. AK played the lead role in planning,  
23 conducting, supervising field study, analysis and report writing; AG for clinical evaluation and BKG  
24 for clinical monitoring and report preparation.  
25  
26  
27

28 **Funding :** This study was supported by an institutional grant from the National JALMA Institute for  
29 Leprosy, Taj Ganj, Agra. No specific funding was asked from any external agency.  
30  
31

32 **Conflict of interests:** None  
33

34 **Patient Consent:** obtained  
35

36 **Ethical Approval** was granted by the institutional ethical committee, which was being informed  
37 periodically about the progress of the work.  
38  
39  
40  
41  
42  
43  
44  
45  
46  
47  
48  
49  
50  
51  
52  
53  
54  
55  
56  
57  
58  
59  
60

1  
2  
3  
4  
5  
6  
7  
8  
9  
10  
11  
12  
13  
14  
15  
16  
17  
18  
19  
20  
21  
22  
23  
24  
25  
26  
27  
28  
29  
30  
31  
32  
33  
34  
35  
36  
37  
38  
39  
40  
41  
42  
43  
44  
45  
46  
47  
48  
49  
50  
51  
52  
53  
54  
55  
56  
57  
58  
59  
60

| Characteristics                                                                                                                         | Patients on W.H.O. MDT (872) |                          |                          |
|-----------------------------------------------------------------------------------------------------------------------------------------|------------------------------|--------------------------|--------------------------|
|                                                                                                                                         | %Total (872)                 | Completed Treatment(621) | Defaulted treatment(251) |
| Age                                                                                                                                     |                              |                          |                          |
| ≤14                                                                                                                                     | 12.5                         | 13.8                     | 9.2                      |
| 15-34                                                                                                                                   | 37.8                         | 36.9                     | 40.2                     |
| 35-54                                                                                                                                   | 35.6                         | 36.4                     | 33.5                     |
| >54                                                                                                                                     | 14.1                         | 12.9                     | 17.1                     |
| Mean (SEM)                                                                                                                              | 34.2(0.6)                    | 33.8(0.7)                | 35.3(1.1)                |
| Sex                                                                                                                                     |                              |                          |                          |
| Male                                                                                                                                    | 45.3                         | 48.1                     | 38.2                     |
| Female                                                                                                                                  | 54.7                         | 51.9                     | 61.8                     |
| Delay in detection (months)                                                                                                             |                              |                          |                          |
| ≤12                                                                                                                                     | 51.8                         | 49.6                     | 57.4                     |
| 13-36                                                                                                                                   | 32.3                         | 34.0                     | 28.3                     |
| >36                                                                                                                                     | 15.8                         | 16.4                     | 14.3                     |
| Patches                                                                                                                                 |                              |                          |                          |
| 0-2                                                                                                                                     | 79.1                         | 78.1                     | 81.7                     |
| 3-5                                                                                                                                     | 20.9                         | 21.9                     | 18.3                     |
| Nerves                                                                                                                                  |                              |                          |                          |
| 0                                                                                                                                       | 59.7                         | 58.3                     | 63.3                     |
| 1                                                                                                                                       | 40.3                         | 41.7                     | 36.7                     |
| Clinical status*                                                                                                                        |                              |                          |                          |
| I/TT                                                                                                                                    | 12.9                         | 12.7                     | 13.5                     |
| BT/BTR                                                                                                                                  | 84.6                         | 85.0                     | 83.7                     |
| N                                                                                                                                       | 2.5                          | 2.3                      | 2.8                      |
| Smear                                                                                                                                   |                              |                          |                          |
| +ve                                                                                                                                     | 0.2                          | 0.3                      | 0                        |
| -Ve                                                                                                                                     | 18.4                         | 18.8                     | 17.1                     |
| Not done                                                                                                                                | 81.4                         | 80.9                     | 82.9                     |
| *I (Indeterminate), TT(Tuberculoid), BT(Borderline Tuberculoid), BTR(BT with initial Type 1 reaction), N(Neurotic without skin lesions) |                              |                          |                          |

Table 2: Clinical status of patients at the last visit who completed 6 months multidrug treatment (MDT) for Leprosy

| Clinical status   | Duration of Follow up (Years) |      |      |      |     | Total(%)      |
|-------------------|-------------------------------|------|------|------|-----|---------------|
|                   | <1                            | 1-3  | 3-5  | 5-8  | >8  |               |
| Complete Cure     | 18                            | 40   | 357  | 114  | 16  | 545<br>(91.0) |
| Partial /Not Cure | 5                             | 3    | 2    | 0    | 0   | 10(1.7)       |
| Relapse           | 1                             | 11   | 12   | 2    | 0   | 26(4.3)       |
| Relapse+Reaction  | 0                             | 0    | 2    | 0    | 0   | 2 (0.3)       |
| Relapse+Grade 1   | 0                             | 0    | 1    | 1    | 1   | 3(0.5)        |
| Relapse+Grade 2   | 0                             | 2    | 2    | 0    | 0   | 4(0.7)        |
| Only Grade 1      | 0                             | 0    | 1    | 0    | 0   | 1(0.2)        |
| Only Grade 2      | 0                             | 2    | 2    | 0    | 0   | 4(0.7)        |
| Not cured+Grade 1 | 0                             | 0    | 1    | 0    | 0   | 1(0.2)        |
| Type 1 Reaction   | 1                             | 2    | 0    | 0    | 0   | 3(0.5)        |
| Total             | 25                            | 60   | 380  | 117  | 17  | 599           |
| %                 | 4.2                           | 10.0 | 63.4 | 19.5 | 2.9 | (100.0)       |

Table 3: Incidence of relapses/100 person years at risk

|                           | Cases | Mean Person Years | Person Years at risk (PYAR) | No. of Relapses | Relapse/ 100 PYAR |
|---------------------------|-------|-------------------|-----------------------------|-----------------|-------------------|
| Age                       |       |                   |                             |                 |                   |
| <15                       | 81    | 4.62              | 374.4                       | 06              | 1.6               |
| 15-34                     | 221   | 4.23              | 933.8                       | 11              | 1.2               |
| 35-54                     | 220   | 4.53              | 996.7                       | 10              | 1.0               |
| >54                       | 77    | 4.31              | 331.7                       | 08              | 2.4               |
| Total                     | 599   | 4.39              | 2636.4                      | 35              | 1.3               |
| Sex                       |       |                   |                             |                 |                   |
| Male                      | 287   | 4.27              | 1226.9                      | 16              | 1.3               |
| Female                    | 312   | 4.52              | 1409.5                      | 19              | 1.4               |
| Delay in Treatment (Year) |       |                   |                             |                 |                   |
| Upto 1                    | 301   | 4.37              | 1315.2                      | 17              | 1.3               |
| 1-2                       | 201   | 4.22              | 850.8                       | 11              | 1.3               |
| >3                        | 97    | 4.85              | 470.4                       | 07              | 1.5               |
| Patches                   |       |                   |                             |                 |                   |
| 0-2                       | 466   | 4.37              | 2037.7                      | 28              | 1.4               |
| 3-5                       | 133   | 4.50              | 598.7                       | 07              | 1.2               |
| Nerves                    |       |                   |                             |                 |                   |
| 0                         | 344   | 4.24              | 1458.7                      | 21              | 1.4               |
| 1                         | 255   | 4.62              | 1177.7                      | 14              | 1.2               |

1  
2  
3  
4  
5  
6  
7  
8  
9  
10  
11  
12  
13  
14  
15  
16  
17  
18  
19  
20  
21  
22  
23  
24  
25  
26  
27

| Factor                    | Completed Treatment |      | Defaulters |      | X <sup>2</sup> and p-value |            |
|---------------------------|---------------------|------|------------|------|----------------------------|------------|
|                           | Cases               | %CID | Cases      | %CID | Completed Treatment        | Defaulters |
| Age <15                   | 81                  | 0    | 20         | 0    | 22.7, 0.0001               | NS         |
| 15-34                     | 217                 | 0.46 | 71         | 1.41 |                            |            |
| 35-54                     | 219                 | 2.28 | 72         | 2.78 |                            |            |
| >54                       | 75                  | 9.33 | 35         | 2.86 |                            |            |
| Total                     | 592                 | 2.20 | 198        | 2.02 |                            |            |
| Sex Male                  | 280                 | 1.74 | 66         | 0    | NS                         | NS         |
| Female                    | 312                 | 2.56 | 132        | 3.01 |                            |            |
| Patch 0-2                 | 459                 | 2.18 | 164        | 1.83 | NS                         | NS         |
| 3-5                       | 133                 | 2.26 | 34         | 2.94 |                            |            |
| Nerve 0                   | 344                 | 1.16 | 127        | 2.36 | 4.1, 0.043                 | NS         |
| 1                         | 248                 | 3.63 | 71         | 1.41 |                            |            |
| Delay in Treatment <12 Mo | 299                 | 1.67 | 115        | 2.61 | NS                         | NS         |
| 13-36                     | 200                 | 3.00 | 55         | 0    |                            |            |
| >36                       | 93                  | 2.15 | 28         | 3.57 |                            |            |

28  
29  
30  
31  
32  
33  
34  
35  
36  
37  
38  
39  
40  
41  
42  
43  
44  
45  
46  
47  
48  
49  
50  
51  
52  
53  
54  
55  
56  
57  
58  
59  
60

|                         | Cases | Mean Person Years | Person Years at risk (PYAR) | new disability cases | incidence/ 100 PYAR |
|-------------------------|-------|-------------------|-----------------------------|----------------------|---------------------|
| Completed MDT Treatment | 592   | 4.40              | 2597.4                      | 13                   | 0.50*               |
| Defaulters of MDT       | 198   | 4.72              | 933.7                       | 4                    | 0.43*               |
| Early (<3 months)       | 142   | 4.87              | 691.4                       | 3                    | 0.43                |
| Late (3-5 month)        | 56    | 4.33              | 242.3                       | 1                    | 0.41                |
| All                     | 789   | 4.48              | 3531.1                      | 17                   | 0.48                |

\*Log rank test= 0.23, p=0.63



## Reference

1. Kaimal S, Thapa DM. Relapse in leprosy. *Ind J Derm Ven Lep* 2009; 75(2): 126-135.
2. Becx-Bleumink M. Relapse among leprosy patients treated with multidrug therapy. Experience in the leprosy control programme of ALERT in Ethiopia; practical difficulties with diagnosing relapse, operational procedures and criteria for diagnosing relapse. *Int J Lepr* 1992;60:421-435.
3. The Leprosy Unit, WHO. Risk of relapse in leprosy. *Indian J Lepr* 1995;67:13-26.
4. Lobo D. Treatment failures with multidrug treatment. *Lepr Rev* 1992;63:93s-98s.
5. Abdul KS. An analysis of relapsed leprosy cases. *Ind J Derm Ven Lep* 2000; 66(3): 126-128.
6. Pandian TD, Sithambram M, Bharathi R, et al. A study of relapse in non-lepromatous and intermediate groups of leprosy. *Ind J Lepr* 1985; 57(1):149-158.
7. Ali MK, Thorat DM, Subramanian M, Parthasarathy G, Selvaraj U, Prabhakar V. A study on trend of relapse in leprosy and factors influencing relapse. *Indian J Lepr* 2005;77:105-15.
8. Boerrigter G, Ponnighaus JM, Fine PE, et al. Four-year follow up results of a WHO-recommended multiple-drug regimen in paucibacillary leprosy patients in Malawi. *Int J Lepr* 1991;59:255-61.
9. Kumar A, Girdhar A, Girdhar BK. Risk of developing disability in pre and post multidrug therapy treatment among multibacillary leprosy: Agra MB Cohort study. **BMJ open** 2012;2:e000361.doi:10.1136/bmjopen-2011-000361.
10. Kumar A, Yadav VS, Girdhar A, et al. Some Epidemiological Observations on Leprosy in Agra, India. *Int J Lepr* **2001, 69(3):234-240.**
11. Kumar A, Girdhar A, Girdhar BK. Epidemiology of Leprosy in Urban Agra, India. *Lepr Rev*, 2003; 74:31-34.
12. Kumar A, Girdhar A, Girdhar BK. Prevalence of leprosy in Agra district (U.P.) India during 2001-2003. *Int J Lepr* ,2005, 73(2):115-121.
13. Kumar A, Girdhar A, Chakma JC, et al. A rapid survey for Leprosy in Agra District (2004-06): Epidemiological Observations. *J Commun Dis*; 2008,40(4): 277-284
14. Ramachandran A, Seshadri PS. Relapses or reversal reaction: the case for a therapeutic trial of steroids. *Lepr Rev* 1988;59:271-272.
15. Statistical Programme for Social Scientists (SPSS), v.12. USA.1999.
16. Le Chap T. Analysis of Categorical data. USA: John Wiley & Sons, 1988.
17. WHO Expert Committee on Leprosy. World Health Organization Tech Rep Ser 1998;874:1-43.

1  
2  
3  
4  
5  
6  
7  
8  
9  
10  
11  
12  
13  
14  
15  
16  
17  
18  
19  
20  
21  
22  
23  
24  
25  
26  
27  
28  
29  
30  
31  
32  
33  
34  
35  
36  
37  
38  
39  
40  
41  
42  
43  
44  
45  
46  
47  
48  
49  
50  
51  
52  
53  
54  
55  
56  
57  
58  
59  
60

**Figure 1: Incidence of relapse in PB leptosy after MDT**

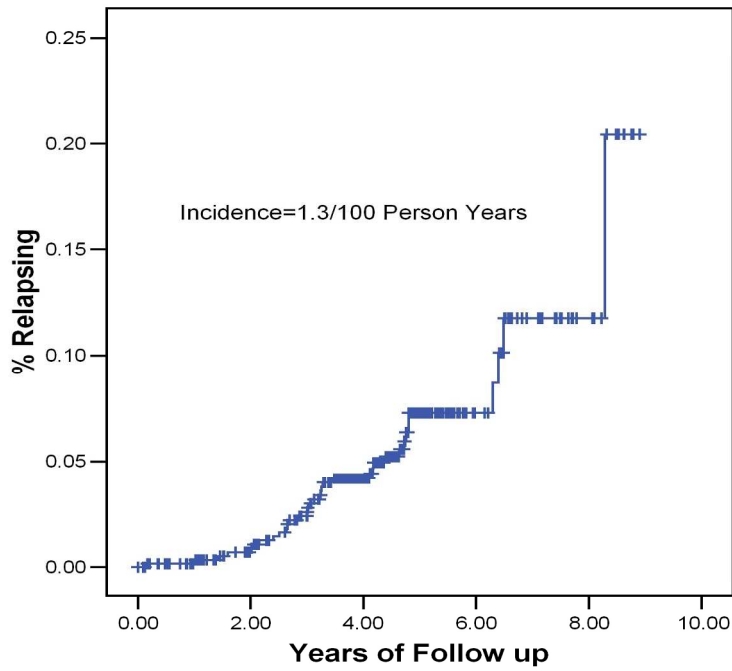

617x517mm (96 x 96 DPI)

For peer review only

Figure 2: Incidence of disability in PB Leprosy by Treatment status

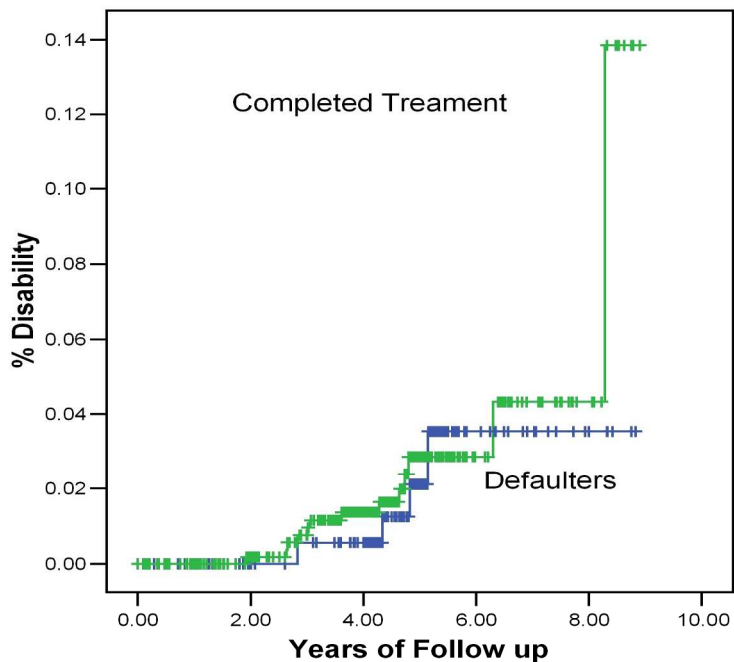

630x524mm (96 x 96 DPI)

For peer review only

STROBE 2007 (v4) Statement—Checklist of items that should be included in reports of cohort studies

| Section/Topic             | Item # | Recommendation                                                                                                                                                                       | Reported on page # |
|---------------------------|--------|--------------------------------------------------------------------------------------------------------------------------------------------------------------------------------------|--------------------|
| Title and abstract        | 1      | (a) Indicate the study’s design with a commonly used term in the title or the abstract                                                                                               | 1                  |
|                           |        | (b) Provide in the abstract an informative and balanced summary of what was done and what was found                                                                                  | 2                  |
| <b>Introduction</b>       |        |                                                                                                                                                                                      |                    |
| Background/rationale      | 2      | Explain the scientific background and rationale for the investigation being reported                                                                                                 | 3                  |
| Objectives                | 3      | State specific objectives, including any prespecified hypotheses                                                                                                                     | 3                  |
| <b>Methods</b>            |        |                                                                                                                                                                                      |                    |
| Study design              | 4      | Present key elements of study design early in the paper                                                                                                                              | 4-6                |
| Setting                   | 5      | Describe the setting, locations, and relevant dates, including periods of recruitment, exposure, follow-up, and data collection                                                      | 4                  |
| Participants              | 6      | (a) Give the eligibility criteria, and the sources and methods of selection of participants. Describe methods of follow-up                                                           | 4                  |
|                           |        | (b) For matched studies, give matching criteria and number of exposed and unexposed                                                                                                  |                    |
| Variables                 | 7      | Clearly define all outcomes, exposures, predictors, potential confounders, and effect modifiers. Give diagnostic criteria, if applicable                                             | 5                  |
| Data sources/ measurement | 8*     | For each variable of interest, give sources of data and details of methods of assessment (measurement). Describe comparability of assessment methods if there is more than one group | 5-6                |
| Bias                      | 9      | Describe any efforts to address potential sources of bias                                                                                                                            | none               |
| Study size                | 10     | Explain how the study size was arrived at                                                                                                                                            | 4                  |
| Quantitative variables    | 11     | Explain how quantitative variables were handled in the analyses. If applicable, describe which groupings were chosen and why                                                         | 5-6                |
| Statistical methods       | 12     | (a) Describe all statistical methods, including those used to control for confounding                                                                                                | 6                  |
|                           |        | (b) Describe any methods used to examine subgroups and interactions                                                                                                                  |                    |
|                           |        | (c) Explain how missing data were addressed                                                                                                                                          | Not applicable     |
|                           |        | (d) If applicable, explain how loss to follow-up was addressed                                                                                                                       | 5                  |
|                           |        | (e) Describe any sensitivity analyses                                                                                                                                                |                    |
| <b>Results</b>            |        |                                                                                                                                                                                      |                    |

|                          |     |                                                                                                                                                                                                              |     |
|--------------------------|-----|--------------------------------------------------------------------------------------------------------------------------------------------------------------------------------------------------------------|-----|
| Participants             | 13* | (a) Report numbers of individuals at each stage of study—eg numbers potentially eligible, examined for eligibility, confirmed eligible, included in the study, completing follow-up, and analysed            | 6   |
|                          |     | (b) Give reasons for non-participation at each stage                                                                                                                                                         | 5-6 |
|                          |     | (c) Consider use of a flow diagram                                                                                                                                                                           | 5   |
| Descriptive data         | 14* | (a) Give characteristics of study participants (eg demographic, clinical, social) and information on exposures and potential confounders                                                                     | 7   |
|                          |     | (b) Indicate number of participants with missing data for each variable of interest                                                                                                                          | 5-6 |
|                          |     | (c) Summarise follow-up time (eg, average and total amount)                                                                                                                                                  | 8   |
| Outcome data             | 15* | Report numbers of outcome events or summary measures over time                                                                                                                                               | 7-8 |
| Main results             | 16  | (a) Give unadjusted estimates and, if applicable, confounder-adjusted estimates and their precision (eg, 95% confidence interval). Make clear which confounders were adjusted for and why they were included | 7-8 |
|                          |     | (b) Report category boundaries when continuous variables were categorized                                                                                                                                    | 7-8 |
|                          |     | (c) If relevant, consider translating estimates of relative risk into absolute risk for a meaningful time period                                                                                             |     |
| Other analyses           | 17  | Report other analyses done—eg analyses of subgroups and interactions, and sensitivity analyses                                                                                                               |     |
| <b>Discussion</b>        |     |                                                                                                                                                                                                              |     |
| Key results              | 18  | Summarise key results with reference to study objectives                                                                                                                                                     | 8-9 |
| <b>Limitations</b>       |     |                                                                                                                                                                                                              |     |
| Interpretation           | 20  | Give a cautious overall interpretation of results considering objectives, limitations, multiplicity of analyses, results from similar studies, and other relevant evidence                                   | 8-9 |
| Generalisability         | 21  | Discuss the generalisability (external validity) of the study results                                                                                                                                        | 8-9 |
| <b>Other information</b> |     |                                                                                                                                                                                                              |     |
| Funding                  | 22  | Give the source of funding and the role of the funders for the present study and, if applicable, for the original study on which the present article is based                                                | 10  |

\*Give information separately for cases and controls in case-control studies and, if applicable, for exposed and unexposed groups in cohort and cross-sectional studies.

**Note:** An Explanation and Elaboration article discusses each checklist item and gives methodological background and published examples of transparent reporting. The STROBE checklist is best used in conjunction with this article (freely available on the Web sites of PLoS Medicine at <http://www.plosmedicine.org/>, Annals of Internal Medicine at <http://www.annals.org/>, and Epidemiology at <http://www.epidem.com/>). Information on the STROBE Initiative is available at [www.strobe-statement.org](http://www.strobe-statement.org).
